# Supplementary material for: Gradual compaction of the nascent peptide during cotranslational folding on the ribosome
Source: eLife. 2020 Oct 27;9:e60895. doi: 10.7554/eLife.60895 (PMC7593090; doi:10.7554/eLife.60895)
Supplement: Figure 1—figure supplement 1—source data 1. [file elife-60895-fig1-figsupp1-data1.xlsx]

## Sheet: Figure S1c 
	HemK W6F AP
Nascent chain length, aa	Data 1	Data 2	Data 3
26	0.22	0.23	0.18
38	0.6	0.62	0.64
50	0.7	0.79	0.76
56	0.52	0.55	0.55
68	0.28	0.28	0.25
80	0.51	0.49	0.51
99	0.12	0.31	0.12

## Sheet: Figure S1g
	HemK Pro AP
Nascent chain length, aa	Data 1	Data 2	Data 3
22	0.44	0.48	0.46
24	0.28	0.34	0.32
26	0.19	0.3	0.27
28	0.19	0.3	0.25
30	0.21	0.3	0.23
32	0.25	0.31	0.23
34	0.44	0.47	0.38
36	0.32	0.31	0.24
38	0.45	0.4	0.34
40	0.2	0.21	0.15
42	0.37	0.31	0.29
44	0.42	0.34	0.28
46	0.46	0.36	0.32
48	0.4	0.27	0.25
