# Supplementary material for: Gradual compaction of the nascent peptide during cotranslational folding on the ribosome
Source: eLife. 2020 Oct 27;9:e60895. doi: 10.7554/eLife.60895 (PMC7593090; doi:10.7554/eLife.60895)
Supplement: Figure 1—source data 1. [file elife-60895-fig1-data1.xlsx]

## Sheet: Figure 1c
		HemK wt AP						HemK 4xA AP
	Nascent chain length, aa	Data 1	Data 2	Data 3			Nascent chain length, aa	Data 1	Data 2	Data 3
	101	0.2	0.43	0.32			101	0.37	0.45	0.36
	99	0.07	0.17	0.13			99	0.26	0.35	0.17
	97	0.11	0.29	0.26			97	0.35	0.43	0.28
	95	0.16	0.16	0.17			95	0.32	0.38	0.23
	93	0.51	0.7	0.55			91	0.68	0.65	0.61
	91	0.67	0.77	0.6			90	0.46	0.49	0.4
	90	0.44	0.4	0.32			89	0.63	0.64	0.61
	89	0.59	0.74	0.61			88	0.5	0.6	0.51
	88	0.28	0.49	0.41			87	0.55	0.66	0.62
	87	0.48	0.63	0.59			86	0.63	0.65	0.62
	86	0.7	0.58	0.54			85	0.42	0.46	0.34
	85	0.21	0.2	0.21			84	0.38	0.42	0.3
	84	0.2	0.16	0.15			83	0.57	0.58	0.51
	83	0.31	0.37	0.28			82	0.5	0.51	0.4
	82	0.25	0.26	0.19			81	0.49	0.51	0.44
	81	0.19	0.32	0.22			80	0.65	0.64	0.59
	80	0.36	0.67	0.46			79	0.51	0.52	0.42
	79	0.22	0.45	0.34			78	0.75	0.68	0.69
	78	0.68	0.82	0.71			77	0.72	0.68	0.65
	77	0.7	0.83	0.74			76	0.77	0.71	0.68
	76	0.77	0.87	0.8			71	0.34	0.3	0.2
	75	0.71	0.83	0.75			68	0.44	0.42	0.36
	73	0.61	0.63	0.53			66	0.52	0.37	0.33
	71	0.26	0.33	0.28			65	0.73	0.62	0.56
	68	0.3	0.32	0.32			62	0.62	0.56	0.51
	66	0.27	0.28	0.3			58	0.36	0.36	0.26
	64	0.41	0.42	0.42			56	0.29	0.28	0.23
	62	0.42	0.41	0.43			54	0.6	0.51	0.44
	58	0.44	0.42	0.46			52	0.68	0.58	0.58
	56	0.51	0.4	0.49			50	0.76	0.65	0.67
	54	0.44	0.49	0.44			48	0.51	0.35	0.38
	52	0.63	0.59	0.66			46			0.63
	50	0.72	0.77	0.81			44	0.77	0.65	0.68
	48	0.51	0.52	0.53			42	0.72	0.58	0.58
	46	0.68	0.74	0.73			40	0.33	0.28	0.22
	44	0.67	0.75	0.74			38	0.73	0.67	0.66
	42	0.62	0.68	0.6			34	0.74	0.6	0.6
	40	0.22	0.19	0.19			32	0.32	0.24	0.25
	38	0.7	0.76	0.72			30	0.36	0.23	0.27
	36	0.53	0.56	0.52			28	0.26	0.16	0.21
	34	0.55	0.67	0.61			26	0.24	0.15	0.2
	32	0.24	0.27	0.22			24	0.49	0.35	0.38
	30	0.29	0.31	0.27			22	0.7	0.61	0.57
	28	0.14	0.16	0.13
	26	0.19	0.16	0.15
	24	0.34	0.39	0.31
	22	0.6	0.66	0.55
