# Supplementary material for: Gradual compaction of the nascent peptide during cotranslational folding on the ribosome
Source: eLife. 2020 Oct 27;9:e60895. doi: 10.7554/eLife.60895 (PMC7593090; doi:10.7554/eLife.60895)
Supplement: Figure 2—source data 1. [file elife-60895-fig2-data1.xlsx]

## Sheet: Figure 2a
Time, s	W6	4xA W6	W6F	4xA W6F
1.38e-08	1.07077	0.96926	1.03764	1.01517
1.46e-08	1.15042	1.08618	1.12954	1.10512
1.54e-08	1.13489	1.0953	1.19205	1.16661
1.66e-08	1.32481	1.33667	1.28287	1.29964
1.82e-08	1.17167	1.17447	1.17043	1.16864
1.98e-08	1.16528	1.13886	1.14089	1.1559
2.14e-08	1.27292	1.26538	1.25799	1.26005
2.3e-08	1.14609	1.14705	1.16011	1.11001
2.46e-08	1.19989	1.18162	1.18033	1.18
2.62e-08	1.26846	1.27709	1.27688	1.32218
2.78e-08	1.17497	1.11258	1.13584	1.11392
2.94e-08	1.21978	1.18001	1.14166	1.20022
3.1e-08	1.26106	1.24369	1.26728	1.23409
3.34e-08	1.20945	1.19454	1.22178	1.20826
3.66e-08	1.19433	1.17545	1.20041	1.16816
3.98e-08	1.20538	1.17202	1.21735	1.18863
4.3e-08	1.20535	1.20427	1.25531	1.2343
4.62e-08	1.20958	1.17081	1.19269	1.17116
4.94e-08	1.22087	1.14947	1.21797	1.18332
5.26e-08	1.21687	1.20367	1.24451	1.23207
5.58e-08	1.2249	1.17901	1.21735	1.19976
5.9e-08	1.17389	1.16753	1.19874	1.17365
6.22e-08	1.19363	1.19798	1.22855	1.2131
6.7e-08	1.21406	1.1966	1.21758	1.22513
7.34e-08	1.19789	1.18612	1.19826	1.18552
7.98e-08	1.20925	1.1703	1.20338	1.20124
8.62e-08	1.20644	1.1985	1.20859	1.19145
9.26e-08	1.20513	1.18341	1.18712	1.20712
9.9e-08	1.2044	1.18143	1.18832	1.19121
1.05e-07	1.20703	1.17759	1.21749	1.19806
1.12e-07	1.21137	1.18265	1.20649	1.20962
1.18e-07	1.21109	1.18763	1.20017	1.20657
1.25e-07	1.19409	1.18475	1.1861	1.19842
1.34e-07	1.19668	1.17878	1.19768	1.19964
1.47e-07	1.1922	1.18579	1.21183	1.19793
1.6e-07	1.1862	1.17553	1.17968	1.19064
1.73e-07	1.19732	1.18379	1.1982	1.19816
1.85e-07	1.18921	1.18619	1.21153	1.19936
1.98e-07	1.18218	1.18456	1.1909	1.19798
2.11e-07	1.19534	1.17634	1.19422	1.20392
2.24e-07	1.19947	1.17622	1.19497	1.1849
2.37e-07	1.20274	1.17843	1.21054	1.19697
2.49e-07	1.1892	1.16742	1.17961	1.1932
2.69e-07	1.18321	1.17937	1.1974	1.18609
2.94e-07	1.20184	1.17257	1.19263	1.20355
3.2e-07	1.19118	1.18217	1.19078	1.19876
3.45e-07	1.19218	1.1743	1.19178	1.19138
3.71e-07	1.18915	1.17786	1.19955	1.19619
3.97e-07	1.19065	1.17446	1.19731	1.19111
4.22e-07	1.19519	1.17308	1.18573	1.18917
4.48e-07	1.19097	1.16966	1.19211	1.19331
4.73e-07	1.18487	1.17609	1.18385	1.19706
4.99e-07	1.18206	1.16663	1.19332	1.1884
5.37e-07	1.18058	1.17386	1.19027	1.19171
5.89e-07	1.18243	1.16861	1.1867	1.19282
6.4e-07	1.17701	1.16734	1.18366	1.19158
6.91e-07	1.17315	1.1659	1.17904	1.19163
7.42e-07	1.17932	1.16366	1.18308	1.18735
7.93e-07	1.16454	1.16858	1.18403	1.18348
8.45e-07	1.17596	1.15925	1.17829	1.18559
8.96e-07	1.17911	1.15841	1.17612	1.17338
9.47e-07	1.17562	1.1585	1.1816	1.17564
9.98e-07	1.16904	1.16429	1.1765	1.18471
1.07e-06	1.17134	1.15583	1.17667	1.17649
1.18e-06	1.16743	1.1561	1.17125	1.17043
1.28e-06	1.15717	1.1501	1.17003	1.17138
1.38e-06	1.16372	1.15153	1.16608	1.16995
1.48e-06	1.16085	1.15064	1.163	1.17185
1.59e-06	1.15675	1.1477	1.16418	1.16436
1.69e-06	1.15623	1.14417	1.15431	1.1588
1.79e-06	1.15099	1.13734	1.15675	1.15752
1.89e-06	1.14302	1.1382	1.1562	1.15587
2e-06	1.14563	1.13804	1.15022	1.15679
2.15e-06	1.14217	1.13474	1.14834	1.1491
2.35e-06	1.14195	1.13231	1.14233	1.1466
2.56e-06	1.13799	1.12544	1.14087	1.13824
2.76e-06	1.13072	1.12237	1.13295	1.13631
2.97e-06	1.12631	1.11783	1.12786	1.13187
3.17e-06	1.12096	1.11591	1.12519	1.12667
3.38e-06	1.12014	1.10957	1.12167	1.12437
3.58e-06	1.11953	1.1075	1.11807	1.12268
3.79e-06	1.1116	1.10301	1.11299	1.1164
3.99e-06	1.10442	1.10061	1.10861	1.11207
4.3e-06	1.10116	1.09255	1.10416	1.10377
4.71e-06	1.09231	1.08654	1.09588	1.09886
5.12e-06	1.08475	1.07911	1.0889	1.08888
5.53e-06	1.07618	1.07227	1.07966	1.0816
5.94e-06	1.07099	1.06445	1.07103	1.07403
6.35e-06	1.06204	1.05912	1.0659	1.06818
6.76e-06	1.05656	1.05188	1.05628	1.0573
7.17e-06	1.04656	1.04472	1.04865	1.0515
7.58e-06	1.04211	1.03903	1.04285	1.04502
7.99e-06	1.03317	1.03343	1.03783	1.03648
8.6e-06	1.02536	1.02402	1.02634	1.02761
9.42e-06	1.01123	1.01123	1.01265	1.01215
1.02e-05	1	1	1	1
1.11e-05	0.987605	0.98789	0.98705	0.98635
1.19e-05	0.976075	0.977195	0.973835	0.97495
1.27e-05	0.962285	0.96599	0.959985	0.961975
1.35e-05	0.951425	0.95521	0.948115	0.949825
1.43e-05	0.940285	0.943735	0.93649	0.938495
1.52e-05	0.9302	0.934165	0.924775	0.927335
1.6e-05	0.9191	0.92244	0.914865	0.915655
1.72e-05	0.90163	0.908735	0.89714	0.898905
1.88e-05	0.879675	0.88899	0.87561	0.877135
2.05e-05	0.861115	0.87077	0.855735	0.858075
2.21e-05	0.842925	0.852905	0.836055	0.83966
2.38e-05	0.8243	0.836605	0.815835	0.820365
2.54e-05	0.80693	0.81937	0.79793	0.802165
2.7e-05	0.7889	0.803245	0.78089	0.784265
2.87e-05	0.772405	0.786815	0.76311	0.766575
3.03e-05	0.756365	0.772195	0.747895	0.751185
3.19e-05	0.740505	0.757675	0.731235	0.73601
3.44e-05	0.717875	0.736995	0.708825	0.71448
3.77e-05	0.690215	0.711205	0.679395	0.685555
4.1e-05	0.66433	0.68584	0.65303	0.658705
4.42e-05	0.63998	0.662985	0.62797	0.634585
4.75e-05	0.616535	0.640545	0.604365	0.61077
5.08e-05	0.594595	0.61968	0.581595	0.58912
5.41e-05	0.574715	0.60052	0.56063	0.56875
5.73e-05	0.55486	0.58235	0.54244	0.548465
6.06e-05	0.53723	0.5644	0.52277	0.53049
6.39e-05	0.519295	0.547605	0.50588	0.513265
6.88e-05	0.49534	0.524965	0.48128	0.48846
7.54e-05	0.46555	0.496305	0.45163	0.458865
8.19e-05	0.438985	0.47039	0.424545	0.43144
8.85e-05	0.414495	0.446885	0.400375	0.407645
9.5e-05	0.392205	0.424695	0.378175	0.385095
0.000102	0.37215	0.40498	0.357955	0.364735
0.000108	0.353565	0.38655	0.33959	0.346385
0.000115	0.33642	0.36921	0.32273	0.32954
0.000121	0.32077	0.353525	0.307015	0.31361
0.000128	0.30599	0.338855	0.292515	0.299365
0.000138	0.28625	0.31927	0.273165	0.279385
0.000151	0.263265	0.295125	0.25012	0.256305
0.000164	0.24296	0.27447	0.230195	0.23594
0.000177	0.224905	0.25604	0.213125	0.21827
0.00019	0.209055	0.239735	0.197625	0.202495
0.000203	0.195105	0.22479	0.184195	0.18853
0.000216	0.182645	0.2119	0.172115	0.17628
0.000229	0.171655	0.199785	0.16094	0.16525
0.000242	0.16143	0.18898	0.151685	0.15493
0.000256	0.15241	0.17908	0.142555	0.145635
0.000275	0.14024	0.166115	0.131175	0.13437
0.000301	0.12627	0.15107	0.11791	0.120975
0.000328	0.11458	0.13804	0.106955	0.10952
0.000354	0.104395	0.126925	0.097405	0.100065
0.00038	0.096075	0.117195	0.08936	0.091435
0.000406	0.08872	0.10864	0.082325	0.08433
0.000433	0.082275	0.10127	0.07638	0.07818
0.000459	0.07658	0.094815	0.070875	0.072305
0.000485	0.071545	0.08893	0.06608	0.067205
0.000511	0.06724	0.08378	0.06201	0.062995
0.000551	0.061565	0.07684	0.056335	0.057445
0.000603	0.055095	0.069125	0.05011	0.051215
0.000655	0.0498	0.062495	0.04526	0.04581
0.000708	0.04504	0.057105	0.040985	0.04143
0.00076	0.04124	0.05236	0.037685	0.03748
0.000813	0.037995	0.04809	0.034525	0.03439
0.000865	0.03518	0.04441	0.03191	0.0319
0.000918	0.032685	0.04133	0.02978	0.02943
0.00097	0.030305	0.03856	0.02759	0.027325
0.00102	0.02841	0.03635	0.025795	0.02536
0.0011	0.025985	0.03303	0.023515	0.02301
0.00121	0.02329	0.029435	0.02096	0.020415
0.00131	0.02086	0.02638	0.018885	0.01832
0.00142	0.019155	0.02406	0.017135	0.01631
0.00152	0.01747	0.02203	0.015565	0.01496
0.00163	0.015915	0.02025	0.014435	0.01389
0.00173	0.014685	0.01875	0.01343	0.01286
0.00184	0.01378	0.01741	0.01242	0.01183
0.00194	0.012915	0.01631	0.01168	0.01088
0.00204	0.01207	0.015325	0.010965	0.010205
0.0022	0.011215	0.01412	0.009995	0.0093
0.00241	0.00995	0.012445	0.009245	0.00832
0.00262	0.008945	0.01122	0.008295	0.0074
0.00283	0.008105	0.010425	0.007465	0.006665
0.00304	0.007505	0.009375	0.006795	0.005875
0.00325	0.00691	0.008775	0.006435	0.005335
0.00346	0.006285	0.00808	0.0059	0.00509
0.00367	0.00613	0.00746	0.00539	0.00473
0.00388	0.005535	0.007165	0.005	0.004195
0.00409	0.00528	0.006515	0.004755	0.00404
0.0044	0.004625	0.00601	0.00451	0.00381
0.00482	0.004205	0.00538	0.004035	0.00343
0.00524	0.004055	0.004815	0.003765	0.00318
0.00566	0.0036	0.004355	0.003215	0.00273
0.00608	0.003485	0.00389	0.003075	0.00244
0.0065	0.00314	0.003785	0.00273	0.00221
0.00692	0.00306	0.003705	0.00294	0.002175
0.00734	0.002875	0.003555	0.002535	0.002185
0.00776	0.002575	0.00355	0.0023	0.001805
0.00818	0.002545	0.003315	0.00217	0.00198
0.00881	0.002355	0.0028	0.002225	0.001705
0.00965	0.0021	0.002545	0.00183	0.00158
0.01049	0.00206	0.002295	0.001405	0.00121204
0.01132	0.00169	0.002105	0.0014	0.00100638
0.01216	0.00167	0.00188	0.00135	0.000890742
0.013	0.00131	0.001795	0.001385	0.00107759
0.01384	0.001315	0.0018	0.00109	0.000886903
0.01468	0.001165	0.001715	0.001135	0.000822947
0.01552	0.001135	0.001315	0.000908419	0.000786204
0.01636	0.001205	0.00132	0.000927206	0.000683087
0.01762	0.000966829	0.00103457	0.000884154	0.000765394
0.01929	0.000871652	0.00107528	0.000938543	0.000671807
0.02097	0.000815788	0.000980504	0.00082574	0.000593711
0.02265	0.000731034	0.00102416	0.000662054	0.000415348
0.02433	0.000653385	0.000820533	0.000652617	0.00046188
0.026	0.000684485	0.000805483	0.000653319	0.000584964
0.02768	0.000528596	0.000595923	0.000539809	0.000551424
0.02936	0.000237729	0.000615017	0.000586086	0.000341321
0.03104	0.000379598	0.00063454	0.000416703	0.000259534
0.03272	0.000434705	0.000520011	0.000312242	0.000305165
0.03523	0.000451817	0.000492829	0.000198094	0.000281541
0.03859	0.000392716	0.000468436	0.000338918	0.000228226
0.04194	0.000281717	0.000304265	0.000223633	1.1179e-06
0.0453	0.000183619	0.00040843	0.000238132	-4.27063e-05
0.04865	0.000284107	0.000341104	0.000212851	8.00482e-05
0.05201	0.00030271	0.000307555	0.000166638	0.000250412
0.05536	0.000144894	0.000174698	0.000200224	0.000345256
0.05872	0.000288802	0.000142949	0.000157085	0.000278473
0.06208	0.000206482	0.000113711	0.000210973	0.000254152
0.06543	7.61913e-05	9.72856e-05	0.000229714	0.000187216
0.07046	0.000129667	0.000197665	0.000211218	0.000143168
0.07718	8.45858e-05	5.98787e-05	0.000141309	0.000145159
0.08389	3.42405e-05	-6.41044e-05	0.000221676	0.000174354
0.0906	8.70787e-05	0.00015836	0.000157844	0.000104002
0.09731	0.000251851	0.000199143	0.000120622	8.6333e-05
0.10402	0.000178606	6.1893e-05	6.39287e-05	6.58529e-05
0.11073	0.000192821	5.73912e-05	6.0838e-05	-3.06815e-05
0.11744	8.31112e-06	3.6414e-05	0.000122187	0.000155893
0.12415	0.000171424	-8.24756e-05	-7.03752e-06	0.000124283
0.13086	-1.44283e-05	-9.31611e-05	-4.05797e-05	1.7153e-05
0.14093	2.514e-05	-0.000184658	-8.4076e-06	0.000110079
0.15435	3.82743e-05	-0.000159597	2.27715e-05	9.76738e-05
0.16777	2.68182e-05	2.409e-07	-6.69295e-06	7.80921e-05
0.18119	0.000102806	-1.68525e-05	7.24664e-05	1.19926e-05
0.19462	0.000117677	-0.000107915	3.04634e-05	1.44302e-05
0.20804	6.21242e-05	-0.000118187	2.39382e-05	0.000107277
0.22146	0.000137637	-7.1667e-06	-1.40862e-05	6.65906e-05
0.23488	4.07867e-05	-7.20611e-05	-9.30505e-06	-2.4701e-05
0.2483	-3.92825e-06	2.93853e-05	0.000101185	-5.92158e-05
0.26172	2.13546e-05	-4.39719e-05	8.22663e-05	1.76729e-05
0.28186	7.38639e-05	-0.000117034	1.25469e-05	3.2412e-05
0.3087	1.56067e-05	-0.000170819	1.31688e-05	-2.688e-05
0.33554	3.25996e-05	-0.00010466	2.64207e-05	1.60522e-05
0.36239	7.59634e-05	-9.78753e-05	8.03016e-05	3.4109e-05
0.38923	5.39598e-05	-0.000165101	1.10144e-05	3.674e-06
0.41607	3.11418e-05	-0.000127116	1.76165e-05	2.64745e-05
0.44292	-2.17071e-05	-0.000136066	5.86544e-05	4.99135e-05
0.46976	4.67752e-05	-0.000104721	5.88824e-05	8.39218e-05
0.49661	-5.05355e-05	-6.56677e-05	4.19204e-05	2.84695e-05
0.52345	-1.80002e-05	-5.22725e-05	7.83443e-05	0.000125416
0.56371	5.80882e-06	-0.000149045	0.000122835	4.57445e-05
0.6174	-4.93426e-05	-0.000165725	5.69176e-05	3.62575e-05
0.67109	3.09418e-05	-0.000123626	9.50012e-05	6.07186e-05
0.72478	3.10058e-05	-0.000103421	7.75671e-05	8.55158e-05
0.77846	4.06833e-05	-0.000161761	0.00011175	2.70035e-05
0.83215	-3.0838e-06	-0.000197268	0.000125414	1.92675e-05
0.88584	-2.2836e-06	-0.000191938	0.000142067	-3.20035e-05
0.93952	-5.34148e-05	-0.000163138	0.000171463	8.773e-06
0.99321	-3.62683e-05	-8.51037e-05	0.000172593	7.24375e-05

## Sheet: Figure 2b
Time, s	W6	W6F	W6 Glyc	W6F Glyc
7.98e-08	1.08369	1.04774	1.19111	1.0632
8.62e-08	1.0777	1.04231	1.16152	1.038
9.26e-08	1.08096	1.05685	1.20175	1.03848
9.9e-08	1.06008	1.04792	1.17291	1.04307
1.05e-07	1.07178	1.05667	1.19679	1.03653
1.12e-07	1.05742	1.05311	1.13916	1.06572
1.18e-07	1.05878	1.04596	1.11967	1.04526
1.25e-07	1.08376	1.04659	1.19483	1.06396
1.34e-07	1.05774	1.05421	1.19261	1.03792
1.47e-07	1.0698	1.0537	1.16094	1.05797
1.6e-07	1.06029	1.05789	1.14047	1.0536
1.73e-07	1.06067	1.04509	1.1311	1.04567
1.85e-07	1.06511	1.04483	1.13811	1.03843
1.98e-07	1.05114	1.06056	1.11513	1.0479
2.11e-07	1.05571	1.05475	1.14392	1.04647
2.24e-07	1.05324	1.05317	1.136	1.03389
2.37e-07	1.06864	1.0458	1.13564	1.02593
2.49e-07	1.05998	1.04308	1.13764	1.0581
2.69e-07	1.05416	1.04691	1.12439	1.05008
2.94e-07	1.05204	1.03875	1.12406	1.03129
3.2e-07	1.05883	1.04364	1.11144	1.03856
3.45e-07	1.06308	1.04427	1.09352	1.03667
3.71e-07	1.05579	1.05173	1.09808	1.02481
3.97e-07	1.04722	1.04027	1.10551	1.0326
4.22e-07	1.04753	1.04106	1.11185	1.03544
4.48e-07	1.05114	1.0499	1.08891	1.04984
4.73e-07	1.05217	1.04431	1.10427	1.03545
4.99e-07	1.04049	1.04961	1.08798	1.03447
5.37e-07	1.04562	1.04051	1.09332	1.04093
5.89e-07	1.04517	1.04152	1.08711	1.04391
6.4e-07	1.04446	1.03754	1.06316	1.05118
6.91e-07	1.04896	1.03719	1.09686	1.04464
7.42e-07	1.04355	1.03869	1.0758	1.03659
7.93e-07	1.03965	1.03593	1.06707	1.03458
8.45e-07	1.0437	1.03245	1.06053	1.03513
8.96e-07	1.03847	1.03386	1.07515	1.03956
9.47e-07	1.03553	1.03417	1.05059	1.03793
9.98e-07	1.03608	1.03153	1.07238	1.03365
1.07e-06	1.03462	1.03196	1.05374	1.03527
1.18e-06	1.03414	1.02708	1.06176	1.04327
1.28e-06	1.03076	1.02759	1.05306	1.04004
1.38e-06	1.02938	1.02606	1.05112	1.03866
1.48e-06	1.02875	1.02099	1.05041	1.03364
1.59e-06	1.02663	1.01843	1.04294	1.03137
1.69e-06	1.0263	1.02214	1.04496	1.03661
1.79e-06	1.02401	1.01768	1.04652	1.02901
1.89e-06	1.02534	1.01771	1.04865	1.02694
2e-06	1.02039	1.01469	1.04146	1.03526
2.15e-06	1.01301	1.01282	1.04491	1.03376
2.35e-06	1.013	1.00888	1.03733	1.02949
2.56e-06	1.00861	1.0043	1.04056	1.02216
2.76e-06	1.00272	1.00458	1.03866	1.03029
2.97e-06	1	1	1.02627	1.0289
3.17e-06	1.00024	0.993163	1.02675	1.02539
3.38e-06	0.993176	0.992875	1.03245	1.02859
3.58e-06	0.993757	0.986354	1.03198	1.02207
3.79e-06	0.98595	0.987571	1.029	1.02264
3.99e-06	0.987245	0.98142	1.03324	1.01748
4.3e-06	0.979037	0.977073	1.02321	1.01728
4.71e-06	0.974374	0.973195	1.02009	1.01893
5.12e-06	0.965112	0.965628	1.02431	1.02175
5.53e-06	0.959127	0.963012	1.01778	1.01515
5.94e-06	0.952902	0.955156	1.01333	1.01529
6.35e-06	0.947006	0.950376	1.01067	1.01708
6.76e-06	0.941531	0.944676	1.01812	1.00829
7.17e-06	0.936074	0.9394	1.01438	1.00679
7.58e-06	0.927034	0.932671	1.01633	1.00455
7.99e-06	0.924471	0.929352	1.01024	1.00861
8.6e-06	0.914932	0.920667	1.00847	1.0069
9.42e-06	0.903963	0.910881	1.00919	1.0038
1.02e-05	0.8932	0.901925	1	1
1.11e-05	0.882089	0.891886	0.99931	0.99985
1.19e-05	0.872228	0.883029	0.9995	0.99647
1.27e-05	0.861759	0.872901	0.99403	0.99379
1.35e-05	0.850201	0.86325	0.99116	0.99198
1.43e-05	0.841591	0.855295	0.99223	0.98928
1.52e-05	0.831525	0.846916	0.98866	0.9846
1.6e-05	0.82404	0.838546	0.98685	0.98764
1.72e-05	0.808828	0.826091	0.98124	0.98303
1.88e-05	0.791491	0.810325	0.97677	0.97858
2.05e-05	0.774538	0.794965	0.97547	0.97699
2.21e-05	0.757532	0.779849	0.97259	0.97328
2.38e-05	0.740302	0.765545	0.96835	0.96705
2.54e-05	0.726815	0.75179	0.96418	0.96682
2.7e-05	0.710594	0.738721	0.95971	0.96258
2.87e-05	0.696857	0.72512	0.95605	0.96037
3.03e-05	0.683343	0.713161	0.95262	0.95582
3.19e-05	0.6694	0.701084	0.94817	0.95667
3.44e-05	0.651321	0.683704	0.94353	0.94999
3.77e-05	0.625892	0.660813	0.93772	0.94664
4.1e-05	0.604	0.640989	0.93125	0.94019
4.42e-05	0.583179	0.621273	0.92395	0.93528
4.75e-05	0.563011	0.602937	0.91893	0.92985
5.08e-05	0.543887	0.586468	0.91084	0.92497
5.41e-05	0.526282	0.569701	0.90522	0.92218
5.73e-05	0.508508	0.553448	0.8974	0.91625
6.06e-05	0.492653	0.538792	0.89324	0.91122
6.39e-05	0.478005	0.524641	0.88712	0.90537
6.88e-05	0.456372	0.505042	0.87738	0.89896
7.54e-05	0.431148	0.480491	0.86672	0.89093
8.19e-05	0.40671	0.458024	0.85347	0.88115
8.85e-05	0.385889	0.437921	0.84232	0.87311
9.5e-05	0.366176	0.419142	0.83127	0.86498
0.000102	0.347714	0.401925	0.81951	0.85613
0.000108	0.33186	0.385789	0.80963	0.84686
0.000115	0.316532	0.370871	0.80024	0.84107
0.000121	0.302286	0.356702	0.78983	0.83113
0.000128	0.289638	0.344183	0.77873	0.82379
0.000138	0.272149	0.325992	0.7645	0.81182
0.000151	0.251373	0.304733	0.74456	0.79675
0.000164	0.232875	0.285369	0.72749	0.78158
0.000177	0.216467	0.268801	0.70946	0.76722
0.00019	0.202247	0.25382	0.69242	0.75458
0.000203	0.189742	0.239768	0.67378	0.74003
0.000216	0.17797	0.227447	0.65934	0.72692
0.000229	0.1676	0.215948	0.64291	0.7144
0.000242	0.157927	0.205891	0.62743	0.70213
0.000256	0.149906	0.196349	0.61426	0.68946
0.000275	0.138571	0.183686	0.59299	0.6725
0.000301	0.125602	0.168416	0.56666	0.65047
0.000328	0.114615	0.155582	0.54209	0.62905
0.000354	0.105067	0.144615	0.5192	0.60915
0.00038	0.096948	0.134784	0.49769	0.59053
0.000406	0.089945	0.125945	0.47712	0.57188
0.000433	0.083755	0.118405	0.45775	0.55458
0.000459	0.077887	0.111649	0.44003	0.53866
0.000485	0.073296	0.105291	0.42368	0.52311
0.000511	0.068687	0.099536	0.4073	0.50729
0.000551	0.062863	0.09205	0.3853	0.48632
0.000603	0.056397	0.083554	0.3578	0.4605
0.000655	0.050975	0.076357	0.33442	0.43663
0.000708	0.046634	0.070359	0.31284	0.41393
0.00076	0.042784	0.064984	0.29364	0.39391
0.000813	0.039363	0.060357	0.27583	0.37549
0.000865	0.036675	0.05601	0.25917	0.35765
0.000918	0.034076	0.052393	0.24425	0.34163
0.00097	0.031735	0.049389	0.2315	0.32636
0.00102	0.029583	0.046431	0.21907	0.31233
0.0011	0.027055	0.042499	0.20266	0.29305
0.00121	0.024402	0.037962	0.18377	0.27027
0.00131	0.022205	0.034499	0.16742	0.25005
0.00142	0.020195	0.031288	0.15321	0.23271
0.00152	0.018534	0.028582	0.1416	0.21718
0.00163	0.017007	0.02649	0.13107	0.20302
0.00173	0.015613	0.024181	0.12177	0.19021
0.00184	0.014354	0.022458	0.11319	0.17891
0.00194	0.013496	0.02078	0.10597	0.16908
0.00204	0.012719	0.019644	0.09945	0.16029
0.0022	0.011469	0.017813	0.09081	0.14799
0.00241	0.010236	0.016181	0.08099	0.13389
0.00262	0.00953	0.014467	0.07319	0.12205
0.00283	0.008735	0.013213	0.06694	0.11188
0.00304	0.008298	0.012122	0.06152	0.10334
0.00325	0.007655	0.011058	0.0568	0.09588
0.00346	0.006762	0.010363	0.05273	0.08916
0.00367	0.006163	0.009687	0.04899	0.08319
0.00388	0.005725	0.008884	0.04623	0.07796
0.00409	0.00544	0.008361	0.04372	0.07334
0.0044	0.005198	0.007206	0.04035	0.06746
0.00482	0.00477	0.00644	0.03665	0.06069
0.00524	0.004805	0.005844	0.03343	0.0549
0.00566	0.0041	0.005628	0.03047	0.05035
0.00608	0.003778	0.005123	0.02796	0.04716
0.0065	0.003314	0.004582	0.02594	0.04414
0.00692	0.002706	0.004194	0.02395	0.04043
0.00734	0.002635	0.004149	0.0225	0.03699
0.00776	0.002581	0.003734	0.02115	0.03429
0.00818	0.002179	0.00313	0.01992	0.03228
0.00881	0.001831	0.003157	0.01858	0.02999
0.00965	0.001858	0.002958	0.01737	0.0277
0.01049	0.001903	0.002625	0.01604	0.02579
0.01132	0.001786	0.002219	0.01474	0.02352
0.01216	0.001527	0.001831	0.01368	0.0214
0.013	0.001652	0.001777	0.01283	0.01996
0.01384	0.00151	0.001614	0.01227	0.01839
0.01468	0.001545	0.001506	0.01136	0.01751
0.01552	0.001527	0.001344	0.01054	0.01701
0.01636	0.00092	0.001326	0.01031	0.01581
0.01762	0.000991	0.001118	0.00964	0.01439
0.01929	0.000791	0.001055	0.00855	0.01345
0.02097	0.000672	0.000813	0.00807	0.01228
0.02265	0.000468	0.000854	0.0081	0.01165
0.02433	0.000384	0.000747	0.00765	0.01071
0.026	0.000487	0.000611	0.00719	0.01042
0.02768	0.000224	0.000866	0.00661	0.00983
0.02936	0.000484	0.000902	0.00584	0.00946
0.03104	0.000732	0.000869	0.00551	0.0084
0.03272	0.0004	0.000517	0.0052	0.00732
0.03523	0.000446	0.000463	0.00519	0.00758
0.03859	6.76e-05	0.000588	0.00466	0.00579
0.04194	0.000155	0.000509	0.00376	0.0052
0.0453	0.000324	0.000284	0.00364	0.00593
0.04865	0.000414	0.000281	0.00382	0.00499
0.05201	0.000224	0.000239	0.00326	0.00503
0.05536	0.000122	0.00012	0.00324	0.00449
0.05872	0.000155	0.000287	0.00283	0.00455
0.06208	0.000139	0.000236	0.00268	0.0036
0.06543	0.000296	0.000346	0.00274	0.00363
0.07046	0.000209	0.000147	0.00203	0.0036
0.07718	0.000241	0.000139	0.00196	0.00296
0.08389	0.000153	0.000229	0.00181	0.00207
0.0906	0.000235	-8.42e-05	0.00205	0.00213
0.09731	7.26e-05	1.76e-05	0.00166	0.00296
0.10402	8.41e-05	-4.57e-05	0.00107	0.00275
0.11073	-1.06e-05	-8.65e-05	0.00132	0.00168
0.11744	-9.08e-05	-8.08e-05	0.00154	0.0012
0.12415	2.31e-05	1.62e-05	0.00103	0.00103
0.13086	2.24e-05	-4.81e-05	0.00126	0.00135
0.14093	2.47e-05	2.41e-05	0.00115	0.00182
0.15435	0.000111	-0.00014	0.000829976	0.00117
0.16777	2.27e-05	-0.00012	0.000860931	0.0018
0.18119	0.000158	-0.00012	0.000349679	0.00059676
0.19462	7.97e-05	6.81e-05	0.000453455	0.00144
0.20804	3.75e-05	-1.69e-05	0.000279329	0.000466339
0.22146	1.13e-05	1.03e-05	0.000123783	0.000371419
0.23488	2.14e-06	1.7e-05	-8.25e-05	0.0002456
0.2483	-0.00018	-1.02e-05	-0.000381931	0.000612406
0.26172	-7.93e-05	-0.0001	-7.78e-05	-0.000247192
0.28186	-3.88e-05	-7.82e-05	9.26e-05	0.000206091
0.3087	-7.94e-05	-7.27e-05	-9.25e-05	0.000608061
0.33554	-0.0002	4.06e-05	-0.000335245	0.000782343
0.36239	-5.95e-05	-9.48e-05	-0.000100179	-0.000686792
0.38923	-7.48e-05	-6.46e-05	-0.00032916	-0.000769564
0.41607	-3.48e-05	-9.16e-05	-0.000454644	0.000100457
0.44292	-0.00011	1.64e-05	-0.000469765	-0.000221736
0.46976	-0.00025	-7.01e-05	-0.000170755	-0.000268555
0.49661	-2.06e-05	-5.56e-05	-0.000118392	0.000139658
0.52345	-0.00014	-5.39e-05	0.000185676	0.000850891
0.56371	-0.00023	-2.64e-05	0.000129247	-2.9e-05
0.6174	-0.00016	-6.63e-05	6.28e-05	0.0007414
0.67109	-0.0001	7.36e-05	-0.000267464	0.000489306
0.72478	-0.00017	6.1e-05	-8.64e-05	0.000354492
0.77846	-0.00011	9.98e-05	-0.000357152	0.000331601
0.83215	-4.45e-05	0.000183	-0.000183354	0.000384869
0.88584	-1.95e-05	8.83e-05	1.66e-05	3.05e-05
0.93952	3.59e-05	6.47e-05	7.29e-05	-0.000396436
0.99321	-6.96e-06	5.68e-05	0.000479496	-5.59e-05

## Sheet: Figure 2c
Time, s	W6	4xA W6	W6F	4xA W6F
7.98e-08	1.11242	1.0562	1.04729	1.05107
8.62e-08	1.04351	1.09689	1.10208	1.08345
9.26e-08	1.06261	1.07516	1.06993	1.04212
9.9e-08	1.06388	1.07553	1.08325	1.05317
1.05e-07	1.12117	1.07175	1.03796	1.06995
1.12e-07	1.09258	1.11425	1.04933	1.05773
1.18e-07	1.04087	1.06887	1.10984	1.05628
1.25e-07	1.13482	1.05945	1.03681	1.01247
1.34e-07	1.09266	1.09852	1.06127	1.0664
1.47e-07	1.06455	1.07522	1.04466	1.05315
1.6e-07	1.06219	1.07287	1.07779	1.0648
1.73e-07	1.04784	1.05752	1.08847	1.04205
1.85e-07	1.07021	1.03086	1.03083	1.06582
1.98e-07	1.09546	1.04422	1.04855	1.07033
2.11e-07	1.05512	1.04314	1.0507	1.06492
2.24e-07	1.05321	1.09117	1.04159	1.0689
2.37e-07	1.03789	1.06082	1.05116	1.01386
2.49e-07	1.04761	1.07583	1.03966	1.05756
2.69e-07	1.05512	1.04031	1.0491	1.05716
2.94e-07	1.05977	1.07991	1.07554	1.04126
3.2e-07	1.07207	1.07442	1.05587	1.0475
3.45e-07	1.04178	1.04861	1.05204	1.06423
3.71e-07	1.0209	1.04271	1.02942	1.04181
3.97e-07	1.03728	1.06093	1.01579	1.06219
4.22e-07	1.05503	1.04431	1.02726	1.04485
4.48e-07	1.05045	1.03793	1.03914	1.05912
4.73e-07	1.06771	1.04904	1.02678	1.03551
4.99e-07	1.06878	1.0756	1.02746	1.04
5.37e-07	1.05914	1.07196	1.04967	1.04746
5.89e-07	1.06575	1.05812	1.04282	1.04216
6.4e-07	1.06106	1.04514	1.05006	1.05496
6.91e-07	1.0419	1.06049	1.02929	1.05409
7.42e-07	1.04011	1.04211	1.03526	1.05421
7.93e-07	1.04473	1.045	1.03999	1.05351
8.45e-07	1.05842	1.03896	1.03914	1.04555
8.96e-07	1.05953	1.04743	1.0327	1.04168
9.47e-07	1.06106	1.0504	1.0514	1.05003
9.98e-07	1.04576	1.0589	1.05693	1.04893
1.07e-06	1.03232	1.04625	1.04159	1.04696
1.18e-06	1.04301	1.04803	1.03029	1.04717
1.28e-06	1.05645	1.0463	1.04279	1.03801
1.38e-06	1.04816	1.04287	1.03039	1.04571
1.48e-06	1.06402	1.0298	1.04342	1.03744
1.59e-06	1.04962	1.03966	1.05481	1.03873
1.69e-06	1.03698	1.03986	1.04101	1.04667
1.79e-06	1.03127	1.03819	1.04609	1.03626
1.89e-06	1.04058	1.03669	1.04553	1.04689
2e-06	1.03735	1.04092	1.03604	1.0335
2.15e-06	1.0507	1.03095	1.03543	1.03606
2.35e-06	1.04154	1.03162	1.03977	1.03833
2.56e-06	1.03744	1.0365	1.04634	1.02911
2.76e-06	1.03944	1.03825	1.02434	1.04099
2.97e-06	1.03494	1.03165	1.03215	1.0265
3.17e-06	1.03862	1.02675	1.02614	1.03277
3.38e-06	1.03453	1.02671	1.02451	1.02817
3.58e-06	1.02954	1.03719	1.02682	1.025
3.79e-06	1.02913	1.03381	1.02426	1.01902
3.99e-06	1.02689	1.02187	1.02371	1.02653
4.3e-06	1.02394	1.02605	1.03427	1.02425
4.71e-06	1.03958	1.02187	1.02438	1.01481
5.12e-06	1.02063	1.02075	1.01656	1.01804
5.53e-06	1.02446	1.01857	1.0199	1.02286
5.94e-06	1.02035	1.01938	1.01811	1.01706
6.35e-06	1.01804	1.01882	1.02103	1.00974
6.76e-06	1.01706	1.01091	1.0193	1.01668
7.17e-06	1.02116	1.01146	1.00945	1.01541
7.58e-06	1.01571	1.01243	1.01685	1.00565
7.99e-06	1.01509	1.00303	1.00956	1.00465
8.6e-06	1.01008	1.00319	1.01162	1.00431
9.42e-06	1.00338	1.00337	0.99895	0.99683
1.02e-05	1	1	1	1
1.11e-05	1.00172	0.99634	0.99579	0.9925
1.19e-05	0.9962	0.98924	0.99175	0.99187
1.27e-05	0.99644	0.98538	0.99592	0.98847
1.35e-05	0.99629	0.98768	0.98921	0.98372
1.43e-05	0.98917	0.9829	0.98841	0.98363
1.52e-05	0.98381	0.97918	0.98592	0.97517
1.6e-05	0.98018	0.9766	0.97849	0.9768
1.72e-05	0.97609	0.97372	0.97312	0.97371
1.88e-05	0.97204	0.96735	0.97232	0.96736
2.05e-05	0.96771	0.96202	0.96945	0.96267
2.21e-05	0.96404	0.95734	0.96021	0.9563
2.38e-05	0.96043	0.95216	0.95623	0.94744
2.54e-05	0.95289	0.9464	0.95374	0.94515
2.7e-05	0.94834	0.9436	0.94674	0.94055
2.87e-05	0.94751	0.94117	0.94449	0.93291
3.03e-05	0.93882	0.9341	0.93747	0.92952
3.19e-05	0.93218	0.92903	0.9384	0.92607
3.44e-05	0.92647	0.92266	0.92909	0.91944
3.77e-05	0.91807	0.91589	0.91785	0.90889
4.1e-05	0.90972	0.90427	0.91185	0.89837
4.42e-05	0.90189	0.89793	0.90495	0.89162
4.75e-05	0.89363	0.88872	0.89828	0.88065
5.08e-05	0.88759	0.87946	0.89591	0.87265
5.41e-05	0.8768	0.87249	0.88702	0.86546
5.73e-05	0.86606	0.86421	0.87697	0.85711
6.06e-05	0.8578	0.85742	0.87162	0.84914
6.39e-05	0.85403	0.8495	0.86408	0.84154
6.88e-05	0.8395	0.83723	0.85349	0.82972
7.54e-05	0.82628	0.82286	0.8381	0.81385
8.19e-05	0.80923	0.80835	0.82701	0.79911
8.85e-05	0.799	0.79518	0.813	0.78426
9.5e-05	0.78222	0.78113	0.8031	0.7703
0.000102	0.77135	0.76733	0.78615	0.75699
0.000108	0.75682	0.75504	0.77474	0.74248
0.000115	0.74277	0.74243	0.76428	0.73024
0.000121	0.73216	0.72849	0.75479	0.71593
0.000128	0.71874	0.7175	0.74205	0.70614
0.000138	0.70026	0.69914	0.72337	0.6859
0.000151	0.6784	0.6766	0.70224	0.66311
0.000164	0.6573	0.65596	0.68241	0.64045
0.000177	0.63494	0.63486	0.6624	0.61784
0.00019	0.61556	0.61433	0.64239	0.59962
0.000203	0.59663	0.5964	0.62727	0.57937
0.000216	0.57825	0.57743	0.60736	0.56113
0.000229	0.5616	0.55999	0.59214	0.54372
0.000242	0.54312	0.54328	0.5746	0.52692
0.000256	0.52768	0.5271	0.55812	0.51021
0.000275	0.50527	0.5053	0.53744	0.48697
0.000301	0.4765	0.47698	0.50977	0.45844
0.000328	0.4497	0.45162	0.48457	0.43299
0.000354	0.42675	0.42712	0.4609	0.40805
0.00038	0.40437	0.40572	0.43916	0.38604
0.000406	0.3841	0.38511	0.41809	0.36554
0.000433	0.36519	0.36595	0.39845	0.34656
0.000459	0.34752	0.34804	0.38149	0.32866
0.000485	0.33113	0.33163	0.36424	0.31258
0.000511	0.31672	0.31606	0.34827	0.29716
0.000551	0.29556	0.2949	0.32706	0.27763
0.000603	0.27036	0.27018	0.30157	0.25319
0.000655	0.24848	0.24807	0.27851	0.23173
0.000708	0.22914	0.22897	0.25873	0.21328
0.00076	0.21208	0.21195	0.23994	0.19673
0.000813	0.19701	0.19769	0.2242	0.18244
0.000865	0.1832	0.18373	0.21006	0.16937
0.000918	0.17118	0.17185	0.19689	0.15834
0.00097	0.16034	0.16056	0.18571	0.14832
0.00102	0.15052	0.15102	0.1753	0.13864
0.0011	0.13823	0.13803	0.16079	0.12636
0.00121	0.12405	0.1241	0.14486	0.11288
0.00131	0.11166	0.1118	0.13082	0.10181
0.00142	0.10165	0.10189	0.11935	0.09242
0.00152	0.09282	0.0935	0.10947	0.08462
0.00163	0.08569	0.08625	0.10114	0.07731
0.00173	0.07905	0.0796	0.09387	0.07128
0.00184	0.07335	0.07415	0.0878	0.06635
0.00194	0.06827	0.06918	0.08181	0.06196
0.00204	0.06373	0.06497	0.07684	0.05806
0.0022	0.05818	0.05937	0.07072	0.05261
0.00241	0.05209	0.05295	0.06329	0.04704
0.00262	0.04673	0.04742	0.0573	0.04259
0.00283	0.04294	0.04337	0.05233	0.03884
0.00304	0.0402	0.04014	0.04836	0.03538
0.00325	0.03716	0.03736	0.04482	0.03237
0.00346	0.03456	0.03481	0.04201	0.03031
0.00367	0.03144	0.03243	0.03909	0.0283
0.00388	0.02975	0.03012	0.03656	0.0269
0.00409	0.028	0.02866	0.03483	0.02501
0.0044	0.026	0.02599	0.03211	0.02281
0.00482	0.02345	0.02331	0.02921	0.01974
0.00524	0.02155	0.0215	0.02684	0.0183
0.00566	0.01941	0.01902	0.02486	0.01692
0.00608	0.01818	0.01759	0.024	0.01586
0.0065	0.01665	0.01619	0.02201	0.01481
0.00692	0.01567	0.0147	0.02109	0.01446
0.00734	0.01445	0.01418	0.02	0.01364
0.00776	0.01388	0.0141	0.01872	0.01265
0.00818	0.01398	0.01464	0.01721	0.01215
0.00881	0.01328	0.01364	0.01557	0.01156
0.00965	0.01176	0.01246	0.01444	0.01053
0.01049	0.01115	0.0116	0.01342	0.00965
0.01132	0.01065	0.01161	0.01273	0.00929
0.01216	0.0111	0.01065	0.012	0.00859
0.013	0.01006	0.01007	0.01089	0.00765
0.01384	0.00868	0.00881	0.0099	0.00753
0.01468	0.00825	0.00818	0.00924	0.00697
0.01552	0.00747	0.00738	0.00949	0.00644
0.01636	0.00758	0.00697	0.00902	0.00657
0.01762	0.00722	0.00677	0.00844	0.00636
0.01929	0.00648	0.00718	0.00786	0.00488
0.02097	0.00588	0.00686	0.00743	0.00471
0.02265	0.00582	0.00572	0.00701	0.00475
0.02433	0.0056	0.00472	0.00618	0.00396
0.026	0.00524	0.00439	0.00497	0.0036
0.02768	0.00485	0.00433	0.00527	0.00398
0.02936	0.00465	0.00406	0.00505	0.00339
0.03104	0.00362	0.00462	0.00483	0.00387
0.03272	0.00362	0.00444	0.0045	0.00298
0.03523	0.00335	0.00352	0.00375	0.0031
0.03859	0.00328	0.00344	0.00457	0.00269
0.04194	0.00345	0.00307	0.00337	0.00235
0.0453	0.00322	0.00263	0.00303	0.00188
0.04865	0.00287	0.00215	0.00293	0.00205
0.05201	0.00264	0.0021	0.00324	0.00212
0.05536	0.00238	0.00172	0.00292	0.00198
0.05872	0.00259	0.00169	0.0029	0.00145
0.06208	0.00193	0.00172	0.00195	0.00136
0.06543	0.00155	0.00186	0.00237	0.00174
0.07046	0.00179	0.00214	0.00255	0.00139
0.07718	0.00148	0.00128	0.00221	0.00149
0.08389	0.00104	0.00132	0.00192	0.00164
0.0906	0.00155	0.00161	0.00182	0.00115
0.09731	0.00102	0.000678	0.00188	0.00103
0.10402	0.00154	0.000516	0.00143	0.000827092
0.11073	0.00128	0.000754	0.00115	0.000566887
0.11744	0.00134	0.000715	0.00123	0.000762965
0.12415	0.000777	0.000568	0.000955	0.000413296
0.13086	0.001	0.000813	0.001	0.00113
0.14093	0.000842	0.000431	0.000531	0.000788751
0.15435	0.000649	0.000643	0.00106	0.000781694
0.16777	0.000491	0.000591	0.000566	0.000495704
0.18119	0.000294	0.000419	0.000462	0.000248027
0.19462	0.0011	0.000303	0.000179	0.000300186
0.20804	0.000634	0.000343	0.000397	0.000681671
0.22146	0.000772	0.000234	0.000343	0.000807389
0.23488	0.000618	-0.00011	0.000425	0.000255366
0.2483	0.000536	0.000229	4.15e-05	0.000251618
0.26172	0.00034	0.000103	0.000468	0.000217148
0.28186	0.000656	0.000317	-0.00014	0.000155944
0.3087	-5.66e-05	0.000108	-0.00013	7.68e-05
0.33554	0.000503	-0.0002	0.000146	0.000162045
0.36239	0.000388	-0.00013	0.00016	0.00010009
0.38923	0.000235	-0.00014	0.000154	-3.42e-05
0.41607	-2.25e-05	-0.00024	-0.00029	-0.000147966
0.44292	0.000172	-0.00033	-0.0004	-7.23e-05
0.46976	0.000461	-0.00031	-0.00037	-0.000215209
0.49661	0.000496	-0.00026	-0.00026	9.12e-05
0.52345	0.000362	-0.00027	-0.00026	4.42e-05
0.56371	0.000127	-0.00024	-0.00017	-0.000265257
0.6174	0.000341	-0.0003	-0.00023	1.84e-05
0.67109	0.000117	-0.00039	-0.00017	-9.02e-06
0.72478	0.000246	-0.00013	8.66e-05	-5.08e-05
0.77846	-6.08e-05	-3.9e-05	-0.00012	-0.000142648
0.83215	0.000319	-0.00016	-0.0001	-0.000135434
0.88584	0.00017	-7.09e-05	-6.35e-05	-4.35e-05
0.93952	0.00018	-0.00021	-0.00028	-3.44e-05
0.99321	0.000556	-0.00014	-0.0002	-1.05e-05
