# Supplementary material for: Gradual compaction of the nascent peptide during cotranslational folding on the ribosome
Source: eLife. 2020 Oct 27;9:e60895. doi: 10.7554/eLife.60895 (PMC7593090; doi:10.7554/eLife.60895)
Supplement: Figure 3—source data 1. [file elife-60895-fig3-data1.xlsx]

## Sheet: Figure 3b
Time, s	W6	4xA W6	W6F	4xA W6F
7.975e-08	2.38551	2.33942	2.13708	2.0932
8.615e-08	2.3271	2.34431	2.13833	2.06644
9.255e-08	2.34997	2.32444	2.11553	2.05995
9.895e-08	2.33406	2.33445	2.12609	2.05773
1.0535e-07	2.31139	2.31585	2.11516	2.05636
1.1175e-07	2.29711	2.30304	2.10787	2.05286
1.1815e-07	2.30277	2.29723	2.09607	2.05904
1.2455e-07	2.31817	2.29248	2.09789	2.03594
1.3415e-07	2.29221	2.27935	2.08453	2.04049
1.4695e-07	2.27611	2.27175	2.07739	2.02858
1.5975e-07	2.26518	2.25662	2.07923	2.02605
1.7255e-07	2.26443	2.25908	2.06094	2.0318
1.8535e-07	2.25557	2.23873	2.05347	1.99769
1.9815e-07	2.2504	2.23663	2.04772	1.99981
2.1095e-07	2.22806	2.22316	2.03932	1.98542
2.2375e-07	2.23475	2.2166	2.0348	1.98636
2.3655e-07	2.22872	2.20732	2.02823	1.96857
2.4935e-07	2.20793	2.20222	2.03053	1.96731
2.6855e-07	2.20901	2.17855	2.00933	1.96189
2.9415e-07	2.17896	2.17243	1.99076	1.94351
3.1975e-07	2.16382	2.16226	1.98866	1.93692
3.4535e-07	2.15026	2.13995	1.9691	1.92711
3.7095e-07	2.14003	2.12305	1.96086	1.90922
3.9655e-07	2.12331	2.10169	1.9495	1.90031
4.2215e-07	2.11224	2.09316	1.93853	1.89267
4.4775e-07	2.09771	2.08229	1.92237	1.88348
4.7335e-07	2.08064	2.06333	1.92809	1.86461
4.9895e-07	2.06755	2.05762	1.91256	1.8549
5.3735e-07	2.05707	2.04038	1.89101	1.83916
5.8855e-07	2.02938	2.00805	1.8742	1.83125
6.3975e-07	2.00599	1.99107	1.84963	1.8049
6.9095e-07	1.99415	1.97168	1.83436	1.78691
7.4215e-07	1.96042	1.95745	1.82029	1.77324
7.9335e-07	1.94476	1.92711	1.80163	1.75473
8.4455e-07	1.9281	1.91396	1.78503	1.74256
8.9575e-07	1.91985	1.8957	1.77066	1.72731
9.4695e-07	1.8919	1.87779	1.75316	1.7174
9.9815e-07	1.88441	1.86502	1.74132	1.69813
1.07495e-06	1.85619	1.84126	1.71917	1.67991
1.17735e-06	1.83014	1.815	1.69235	1.65847
1.27975e-06	1.79882	1.78256	1.66934	1.63202
1.38215e-06	1.77593	1.75843	1.64847	1.61526
1.48455e-06	1.74781	1.73224	1.6261	1.59331
1.58695e-06	1.72351	1.70816	1.60618	1.57348
1.68935e-06	1.70678	1.69013	1.58752	1.55088
1.79175e-06	1.68287	1.66355	1.56881	1.53886
1.89415e-06	1.66926	1.64674	1.54873	1.52002
1.99655e-06	1.64047	1.62695	1.53581	1.50036
2.15015e-06	1.61597	1.60122	1.51357	1.48174
2.35495e-06	1.5877	1.56996	1.48542	1.45628
2.55975e-06	1.56116	1.54315	1.46132	1.43226
2.76455e-06	1.53207	1.51672	1.44047	1.41166
2.96935e-06	1.50982	1.49165	1.41871	1.39037
3.17415e-06	1.48891	1.47437	1.39994	1.37559
3.37895e-06	1.46999	1.45288	1.38224	1.35726
3.58375e-06	1.4506	1.43508	1.36749	1.34448
3.78855e-06	1.43995	1.41878	1.35461	1.33283
3.99335e-06	1.42396	1.40402	1.34207	1.31702
4.30055e-06	1.40291	1.38573	1.32655	1.3032
4.71015e-06	1.38156	1.36394	1.30571	1.28409
5.11975e-06	1.36365	1.34506	1.29073	1.26834
5.52935e-06	1.34752	1.32863	1.27553	1.25453
5.93895e-06	1.33307	1.3127	1.26433	1.24433
6.34855e-06	1.32131	1.30194	1.25239	1.23358
6.75815e-06	1.30879	1.29296	1.24584	1.22595
7.16775e-06	1.30249	1.28346	1.23575	1.22003
7.57735e-06	1.29493	1.27372	1.23152	1.21256
7.98695e-06	1.28547	1.26557	1.22633	1.20798
8.60135e-06	1.27651	1.2576	1.21728	1.19793
9.42055e-06	1.26578	1.24489	1.20948	1.19179
1.02398e-05	1.25514	1.23735	1.20162	1.18504
1.1059e-05	1.24915	1.22915	1.19496	1.17902
1.18782e-05	1.24193	1.22267	1.19007	1.17229
1.26974e-05	1.23534	1.21585	1.1835	1.16801
1.35166e-05	1.22977	1.21043	1.18011	1.16331
1.43358e-05	1.2232	1.20677	1.17605	1.16024
1.5155e-05	1.21699	1.2006	1.17135	1.15572
1.59742e-05	1.21372	1.19591	1.16949	1.15311
1.7203e-05	1.20525	1.18875	1.16253	1.14854
1.88414e-05	1.19727	1.18098	1.15596	1.14209
2.04798e-05	1.19044	1.17376	1.15088	1.13568
2.21182e-05	1.18256	1.1657	1.14562	1.13203
2.37566e-05	1.17481	1.16006	1.13944	1.12691
2.5395e-05	1.16758	1.1546	1.13411	1.1217
2.70334e-05	1.162	1.14735	1.12925	1.11725
2.86718e-05	1.15623	1.14158	1.1254	1.11333
3.03102e-05	1.15081	1.13695	1.12084	1.10889
3.19486e-05	1.14427	1.13212	1.1161	1.10547
3.44062e-05	1.13606	1.12463	1.10882	1.09936
3.7683e-05	1.12658	1.11468	1.10221	1.09245
4.09598e-05	1.11623	1.10738	1.0945	1.08554
4.42366e-05	1.10773	1.09858	1.08712	1.07957
4.75134e-05	1.09919	1.09163	1.08047	1.07376
5.07902e-05	1.09098	1.08289	1.07432	1.06677
5.4067e-05	1.08374	1.07769	1.06843	1.06187
5.73438e-05	1.0759	1.07065	1.06229	1.05706
6.06206e-05	1.07028	1.06379	1.05714	1.05208
6.38974e-05	1.06303	1.05825	1.0515	1.04574
6.88126e-05	1.05306	1.04946	1.04357	1.04019
7.53662e-05	1.04121	1.03873	1.03409	1.03136
8.19198e-05	1.03032	1.02845	1.02476	1.0225
8.84734e-05	1.02002	1.01865	1.01652	1.01469
9.5027e-05	1.00932	1.00916	1.00825	1.00724
0.000101581	1	1	1	1
0.000108134	0.990475	0.99167	0.992525	0.992915
0.000114688	0.982275	0.984585	0.985415	0.98609
0.000121241	0.97363	0.975985	0.978805	0.97941
0.000127795	0.965395	0.968955	0.97112	0.97292
0.000137625	0.953905	0.95854	0.96128	0.963515
0.000150733	0.939085	0.94465	0.949	0.952135
0.00016384	0.925755	0.93174	0.937005	0.94086
0.000176947	0.91302	0.919745	0.925305	0.92985
0.000190054	0.90028	0.90756	0.91438	0.91972
0.000203161	0.888825	0.89647	0.90415	0.909135
0.000216269	0.877375	0.885725	0.89398	0.899345
0.000229376	0.86661	0.8758	0.883855	0.890075
0.000242483	0.856465	0.86591	0.87422	0.881045
0.00025559	0.84619	0.855735	0.86498	0.872055
0.000275251	0.831555	0.842105	0.852045	0.859025
0.000301465	0.81322	0.82481	0.835215	0.84237
0.00032768	0.79614	0.808345	0.81865	0.82671
0.000353894	0.779735	0.7922	0.80338	0.8116
0.000380109	0.76432	0.77755	0.78855	0.79699
0.000406323	0.74986	0.76323	0.7746	0.783475
0.000432537	0.735235	0.749385	0.760985	0.77006
0.000458752	0.72201	0.73631	0.747875	0.757245
0.000484966	0.70906	0.72384	0.7353	0.744855
0.000511181	0.69705	0.711425	0.723215	0.73263
0.000550502	0.67965	0.69406	0.705985	0.715605
0.000602931	0.6574	0.67201	0.684445	0.694025
0.00065536	0.636795	0.6516	0.664135	0.67359
0.000707789	0.61716	0.63248	0.64499	0.65441
0.000760217	0.599345	0.61449	0.62697	0.63656
0.000812646	0.58248	0.59756	0.610005	0.619415
0.000865075	0.56641	0.58138	0.593965	0.602995
0.000917504	0.551315	0.56628	0.578615	0.587805
0.000969933	0.53684	0.551825	0.56404	0.57334
0.00102	0.52301	0.538155	0.550065	0.55958
0.0011	0.50394	0.51902	0.530795	0.539945
0.00121	0.48048	0.495395	0.50688	0.51593
0.00131	0.458995	0.473675	0.484905	0.49396
0.00142	0.43924	0.45381	0.464845	0.47379
0.00152	0.42131	0.435635	0.446335	0.455
0.00163	0.40458	0.4183	0.429195	0.437405
0.00173	0.38906	0.402675	0.41332	0.42127
0.00184	0.37485	0.38808	0.39838	0.40622
0.00194	0.361495	0.374385	0.384625	0.39196
0.00204	0.349335	0.36173	0.371545	0.378755
0.0022	0.332075	0.34423	0.353685	0.360605
0.00241	0.311565	0.323145	0.332315	0.33861
0.00262	0.293195	0.30434	0.31321	0.31915
0.00283	0.27689	0.287715	0.29617	0.30166
0.00304	0.262085	0.272755	0.28078	0.2861
0.00325	0.248725	0.259345	0.26678	0.27177
0.00346	0.236675	0.246975	0.253905	0.25861
0.00367	0.22586	0.235765	0.242225	0.246805
0.00388	0.215975	0.225345	0.23145	0.23601
0.00409	0.2068	0.21567	0.22156	0.22613
0.0044	0.19405	0.20322	0.208535	0.21269
0.00482	0.179285	0.188425	0.193185	0.1969
0.00524	0.166375	0.175165	0.179905	0.18317
0.00566	0.15526	0.163355	0.168155	0.170965
0.00608	0.14505	0.15296	0.15803	0.16013
0.0065	0.13668	0.14387	0.148945	0.150485
0.00692	0.128705	0.135595	0.140455	0.141855
0.00734	0.121625	0.128285	0.133085	0.134285
0.00776	0.115015	0.12197	0.12614	0.12739
0.00818	0.108795	0.11577	0.119735	0.121285
0.00881	0.101025	0.107435	0.11128	0.1129
0.00965	0.092365	0.097805	0.101705	0.1029
0.01049	0.08486	0.08976	0.093845	0.094425
0.01132	0.07812	0.083365	0.08687	0.08737
0.01216	0.07227	0.077325	0.080575	0.081285
0.013	0.067135	0.071525	0.07494	0.07558
0.01384	0.0628	0.066545	0.06995	0.07107
0.01468	0.05868	0.061865	0.06535	0.06702
0.01552	0.05466	0.058205	0.061185	0.063065
0.01636	0.05152	0.05484	0.05808	0.059715
0.01762	0.047755	0.050675	0.054175	0.054805
0.01929	0.042975	0.04631	0.049425	0.04942
0.02097	0.039195	0.04245	0.04529	0.04517
0.02265	0.036035	0.038925	0.041405	0.041405
0.02433	0.033055	0.03625	0.03788	0.03812
0.026	0.030705	0.03374	0.035245	0.03484
0.02768	0.028855	0.03148	0.032995	0.032305
0.02936	0.02664	0.02931	0.030625	0.030305
0.03104	0.024745	0.027385	0.02867	0.028625
0.03272	0.023765	0.02581	0.027045	0.026755
0.03523	0.02198	0.02379	0.02427	0.024445
0.03859	0.019895	0.02137	0.021785	0.02181
0.04194	0.017905	0.01872	0.019765	0.019145
0.0453	0.016175	0.01751	0.01783	0.0178
0.04865	0.014455	0.01587	0.01575	0.017115
0.05201	0.01367	0.01465	0.01369	0.016
0.05536	0.012085	0.013945	0.01298	0.014825
0.05872	0.01106	0.012705	0.01207	0.01363
0.06208	0.010165	0.01159	0.011415	0.013065
0.06543	0.00981	0.00998	0.011015	0.01182
0.07046	0.009305	0.008875	0.010045	0.011125
0.07718	0.00921	0.00839	0.008685	0.00939
0.08389	0.008115	0.007235	0.00811	0.008035
0.0906	0.007215	0.0068	0.006975	0.007665
0.09731	0.0064	0.00689	0.00651	0.00718
0.10402	0.00611	0.005355	0.00535	0.0061
0.11073	0.00539	0.005205	0.00518	0.005875
0.11744	0.0052	0.00497	0.0048	0.00574
0.12415	0.00502	0.003825	0.00432	0.0057
0.13086	0.003645	0.003125	0.00393	0.00466
0.14093	0.004165	0.003525	0.004165	0.003385
0.15435	0.00335	0.00238	0.003575	0.003575
0.16777	0.003215	0.002105	0.002625	0.002885
0.18119	0.001265	0.00208	0.001865	0.00205
0.19462	0.001815	0.001579	0.001508	0.002045
0.20804	0.00175	0.001365	0.00139	0.002585
0.22146	0.001199	0.001585	0.001095	0.00237
0.23488	0.001125	0.001535	0.00119	0.001205
0.2483	0.001037	0.00079	0.001017	0.001403
0.26172	0.001017	0.000534	0.00139	0.001485
0.28186	0.00067	0.001278	0.000882	0.001698
0.3087	0.000687	-0.00018	0.000476	0.001259
0.33554	-0.00084	-0.00072	-0.00021	0.001434
0.36239	0.000141	-0.00043	-0.00031	0.00138
0.38923	0.000211	-0.00141	0.000186	0.000786
0.41607	0.000136	-0.00049	0.000449	-4.2e-05
0.44292	-0.00036	-5.9e-06	0.000383	-0.0001
0.46976	-0.00076	-0.00039	0.000154	0.000409
0.49661	-0.00076	-0.00112	-0.00052	0.00103
0.52345	0.000749	-0.00099	-3.9e-05	0.000122
0.56371	-5.9e-05	-0.00078	0.00023	9.54e-05
0.6174	0.000468	-0.0015	5.94e-06	4.4e-05
0.67109	0.000792	-0.00048	7.78e-05	-0.0002
0.72478	-8.3e-05	-0.00072	-0.00019	-0.00059
0.77846	-0.00046	-0.00081	-0.00125	0.000318
0.83215	-0.00069	-0.00069	-0.00075	-0.0002
0.88584	-0.00063	-0.00142	-0.00076	-0.00026
0.93952	-0.00118	-0.00151	-0.00041	0.000165
0.99321	-0.00102	-0.00073	-0.00157	0.000317

## Sheet: Figure 3c
Time, s	W6	W6F	Loop W6F
7.98e-08	2.30333	2.06202	2.05851
8.62e-08	2.27962	2.03944	2.04088
9.26e-08	2.26484	2.02411	2.05161
9.9e-08	2.25628	2.02662	2.02438
1.05e-07	2.2742	2.01837	2.04909
1.12e-07	2.24032	2.02072	2.02954
1.18e-07	2.2243	2.01382	2.00377
1.25e-07	2.22541	2.00691	2.02361
1.34e-07	2.21649	2.01004	2.02795
1.47e-07	2.21009	1.9981	2.02265
1.6e-07	2.19809	1.98283	1.98961
1.73e-07	2.18795	1.97521	1.99366
1.85e-07	2.17084	1.96477	1.9832
1.98e-07	2.15232	1.96189	1.99511
2.11e-07	2.14604	1.94951	1.97718
2.24e-07	2.15828	1.94694	1.95923
2.37e-07	2.13768	1.93712	1.95917
2.49e-07	2.12344	1.92551	1.96122
2.69e-07	2.11323	1.92637	1.94095
2.94e-07	2.10823	1.9085	1.94089
3.2e-07	2.08745	1.89475	1.92005
3.45e-07	2.07765	1.88521	1.91438
3.71e-07	2.05884	1.87698	1.89803
3.97e-07	2.04038	1.86861	1.89575
4.22e-07	2.0336	1.85303	1.88286
4.48e-07	2.02085	1.85062	1.86974
4.73e-07	2.0097	1.83734	1.86327
4.99e-07	2.00283	1.82248	1.85673
5.37e-07	1.98162	1.81506	1.84443
5.89e-07	1.96045	1.79247	1.82144
6.4e-07	1.94118	1.77682	1.81483
6.91e-07	1.9222	1.76094	1.79861
7.42e-07	1.90636	1.74705	1.77939
7.93e-07	1.88728	1.7334	1.77144
8.45e-07	1.87259	1.71758	1.75272
8.96e-07	1.8555	1.7024	1.73811
9.47e-07	1.84183	1.6891	1.72641
9.98e-07	1.82749	1.68012	1.71336
1.07e-06	1.80465	1.65829	1.69609
1.18e-06	1.77879	1.6361	1.6799
1.28e-06	1.75312	1.61607	1.65723
1.38e-06	1.72883	1.5938	1.63514
1.48e-06	1.70915	1.5769	1.61689
1.59e-06	1.69188	1.5575	1.60214
1.69e-06	1.67081	1.54197	1.5883
1.79e-06	1.65288	1.52561	1.56851
1.89e-06	1.63291	1.51333	1.55365
2e-06	1.61858	1.49611	1.53816
2.15e-06	1.59651	1.47946	1.51945
2.35e-06	1.56882	1.45269	1.49388
2.56e-06	1.54354	1.43034	1.47153
2.76e-06	1.52199	1.41226	1.44889
2.97e-06	1.4995	1.39664	1.43225
3.17e-06	1.48259	1.37888	1.41519
3.38e-06	1.46439	1.3638	1.40044
3.58e-06	1.45042	1.35146	1.3846
3.79e-06	1.43457	1.33678	1.37018
3.99e-06	1.42126	1.32693	1.35994
4.3e-06	1.40043	1.31253	1.34147
4.71e-06	1.38031	1.29522	1.32049
5.12e-06	1.36187	1.28046	1.30827
5.53e-06	1.34741	1.26999	1.29151
5.94e-06	1.33192	1.25764	1.27981
6.35e-06	1.31892	1.24884	1.26747
6.76e-06	1.30812	1.24096	1.2583
7.17e-06	1.29923	1.23419	1.25042
7.58e-06	1.29007	1.22842	1.24357
7.99e-06	1.28279	1.22094	1.23709
8.6e-06	1.27342	1.21402	1.22633
9.42e-06	1.26232	1.20619	1.21831
1.02e-05	1.25231	1.19833	1.20903
1.11e-05	1.24389	1.19229	1.20117
1.19e-05	1.236	1.18681	1.19458
1.27e-05	1.23013	1.18229	1.18985
1.35e-05	1.22175	1.17777	1.18596
1.43e-05	1.21576	1.17319	1.17981
1.52e-05	1.21205	1.17029	1.17497
1.6e-05	1.20728	1.1666	1.17277
1.72e-05	1.19982	1.16084	1.166
1.88e-05	1.19053	1.15509	1.15873
2.05e-05	1.18342	1.14888	1.15217
2.21e-05	1.17583	1.14328	1.14725
2.38e-05	1.16919	1.13849	1.14187
2.54e-05	1.16255	1.13356	1.1365
2.7e-05	1.15611	1.12839	1.131
2.87e-05	1.15001	1.12372	1.12619
3.03e-05	1.1443	1.1189	1.12136
3.19e-05	1.13937	1.11429	1.11706
3.44e-05	1.13113	1.10845	1.11114
3.77e-05	1.12161	1.1015	1.1031
4.1e-05	1.1125	1.094	1.09481
4.42e-05	1.10403	1.08689	1.08842
4.75e-05	1.0955	1.08053	1.08145
5.08e-05	1.08764	1.07419	1.07433
5.41e-05	1.08022	1.06841	1.06813
5.73e-05	1.07364	1.06243	1.06286
6.06e-05	1.06689	1.05655	1.05726
6.39e-05	1.05964	1.05122	1.05132
6.88e-05	1.05096	1.04354	1.04309
7.54e-05	1.039	1.03379	1.03356
8.19e-05	1.02896	1.02439	1.02426
8.85e-05	1.01887	1.01574	1.01541
9.5e-05	1.00894	1.00765	1.00753
0.000102	1	1	1
0.000108	0.991915	0.992045	0.99257
0.000115	0.98272	0.985345	0.98535
0.000121	0.975405	0.978065	0.9787
0.000128	0.967975	0.971325	0.97153
0.000138	0.95728	0.96143	0.96202
0.000151	0.943775	0.9491	0.9507
0.000164	0.93055	0.93755	0.93965
0.000177	0.918665	0.926365	0.9289
0.00019	0.9068	0.915825	0.91888
0.000203	0.89595	0.9054	0.90883
0.000216	0.885375	0.89577	0.89943
0.000229	0.87552	0.885935	0.89012
0.000242	0.86583	0.877015	0.8816
0.000256	0.8563	0.86807	0.87302
0.000275	0.84266	0.854945	0.86083
0.000301	0.82547	0.838715	0.84531
0.000328	0.80929	0.823	0.83044
0.000354	0.793995	0.808025	0.81632
0.00038	0.77941	0.793685	0.80284
0.000406	0.76542	0.77987	0.78951
0.000433	0.75208	0.766765	0.77667
0.000459	0.73911	0.75392	0.76474
0.000485	0.72682	0.741615	0.75289
0.000511	0.71514	0.729795	0.74149
0.000551	0.69822	0.712795	0.72529
0.000603	0.67689	0.691455	0.70468
0.000655	0.657055	0.671415	0.68538
0.000708	0.638295	0.65228	0.66679
0.00076	0.62058	0.63436	0.64928
0.000813	0.603745	0.61718	0.63314
0.000865	0.58811	0.60121	0.61716
0.000918	0.572915	0.585955	0.60224
0.00097	0.55872	0.571355	0.58783
0.00102	0.545025	0.557585	0.57431
0.0011	0.52594	0.538145	0.55538
0.00121	0.502465	0.51436	0.53134
0.00131	0.48095	0.4924	0.50958
0.00142	0.461265	0.47214	0.48949
0.00152	0.44297	0.453565	0.47082
0.00163	0.426125	0.436305	0.45336
0.00173	0.410415	0.42025	0.43719
0.00184	0.395755	0.40524	0.42186
0.00194	0.382245	0.391135	0.4076
0.00204	0.36944	0.37811	0.39414
0.0022	0.352145	0.35992	0.3757
0.00241	0.330895	0.33809	0.35328
0.00262	0.31203	0.3186	0.3337
0.00283	0.295395	0.3012	0.31593
0.00304	0.28005	0.285385	0.3001
0.00325	0.266225	0.2712	0.28552
0.00346	0.253585	0.258255	0.27215
0.00367	0.24218	0.24639	0.26003
0.00388	0.231545	0.23548	0.24876
0.00409	0.22171	0.22554	0.23845
0.0044	0.208495	0.212005	0.22433
0.00482	0.193025	0.196105	0.20793
0.00524	0.179465	0.182235	0.1938
0.00566	0.167375	0.170195	0.18181
0.00608	0.15669	0.15943	0.1709
0.0065	0.14724	0.14989	0.1609
0.00692	0.13875	0.14134	0.15191
0.00734	0.131465	0.13335	0.14358
0.00776	0.124855	0.12619	0.13605
0.00818	0.11861	0.119545	0.12898
0.00881	0.110555	0.110725	0.12005
0.00965	0.101095	0.10064	0.10953
0.01049	0.09271	0.09259	0.10045
0.01132	0.0856	0.085495	0.09237
0.01216	0.07925	0.0791	0.08546
0.013	0.073405	0.07378	0.07943
0.01384	0.068535	0.069415	0.07428
0.01468	0.06481	0.065605	0.07011
0.01552	0.061425	0.06181	0.06575
0.01636	0.05797	0.0586	0.0619
0.01762	0.05382	0.054025	0.05725
0.01929	0.04889	0.04907	0.0516
0.02097	0.044485	0.04432	0.04752
0.02265	0.04097	0.040575	0.04355
0.02433	0.03804	0.037565	0.04054
0.026	0.035495	0.034435	0.03846
0.02768	0.032145	0.03219	0.03523
0.02936	0.03044	0.03019	0.03334
0.03104	0.028645	0.028575	0.03164
0.03272	0.02698	0.02692	0.02985
0.03523	0.02452	0.02376	0.02758
0.03859	0.02182	0.021145	0.02512
0.04194	0.019595	0.01924	0.02174
0.0453	0.017625	0.018405	0.0193
0.04865	0.01667	0.017055	0.01914
0.05201	0.0153	0.015065	0.0181
0.05536	0.01394	0.013565	0.01644
0.05872	0.01371	0.012885	0.01607
0.06208	0.01312	0.01163	0.01534
0.06543	0.01276	0.010045	0.01336
0.07046	0.01188	0.00886	0.01132
0.07718	0.010285	0.007895	0.01101
0.08389	0.008035	0.006745	0.00922
0.0906	0.006625	0.005965	0.00765
0.09731	0.00566	0.00551	0.00653
0.10402	0.00519	0.005325	0.0068
0.11073	0.004665	0.004745	0.00666
0.11744	0.00438	0.00551	0.00685
0.12415	0.004255	0.005395	0.00589
0.13086	0.004365	0.00456	0.00495
0.14093	0.00481	0.004335	0.00581
0.15435	0.00418	0.003305	0.00529
0.16777	0.002865	0.00174	0.00447
0.18119	0.002675	0.0023	0.00327
0.19462	0.00164	0.001995	0.00171
0.20804	0.002165	0.001775	0.00321
0.22146	0.001965	0.001995	0.0014
0.23488	0.00187665	0.00205308	0.00135
0.2483	0.00215	0.00183211	0.00201
0.26172	0.002255	0.00101264	0.00199
0.28186	0.00151711	0.000795495	0.00232
0.3087	0.001755	0.000576049	0.000954
0.33554	0.000884636	0.00114023	0.00129
0.36239	0.00141718	0.000652288	0.000499
0.38923	0.00120552	0.000605062	0.000994
0.41607	0.000242307	0.000661988	0.00212
0.44292	0.000251946	-5.24242e-05	0.000239
0.46976	0.000470647	-0.000294593	0.00142
0.49661	7.66185e-05	-0.0011904	0.0028
0.52345	0.000363584	-0.000565899	0.00222
0.56371	-0.000184486	-0.000725381	0.00189
0.6174	-7.7179e-05	-0.0013281	0.000798
0.67109	0.000386034	-0.00127377	0.000719
0.72478	-4.98795e-05	-0.0014989	0.000682
0.77846	8.3762e-05	-0.000422059	0.000415
0.83215	0.000299168	-0.000631413	0.00071
0.88584	0.00024615	-0.00106891	0.000682
0.93952	-0.00033061	-0.00124566	0.000537
0.99321	-0.000175515	-0.000791982	0.00044

## Sheet: Figure 3d
Time, s	4xA W6	W6	4xA W6F	W6F	Loop W6F
7.975e-08	2.33324	1.91977	1.83073	1.96974	2.01922
8.615e-08	2.29685	1.90785	1.82574	1.95677	2.0243
9.255e-08	2.30042	1.90286	1.82678	1.9723	1.99376
9.895e-08	2.29123	1.89113	1.80924	1.94717	2.00681
1.0535e-07	2.2815	1.8986	1.83236	1.9434	1.99141
1.1175e-07	2.2686	1.89447	1.81886	1.93239	1.98401
1.1815e-07	2.27372	1.87742	1.79431	1.92508	1.97574
1.2455e-07	2.26401	1.86846	1.80937	1.93725	1.99101
1.3415e-07	2.26461	1.86989	1.7973	1.91583	1.98267
1.4695e-07	2.26056	1.85416	1.79151	1.92685	1.96122
1.5975e-07	2.22857	1.8444	1.78454	1.90004	1.96647
1.7255e-07	2.22979	1.84065	1.77027	1.89688	1.95303
1.8535e-07	2.22514	1.82847	1.77081	1.89111	1.94627
1.9815e-07	2.22206	1.82178	1.75849	1.88837	1.93935
2.1095e-07	2.20582	1.81298	1.75896	1.87762	1.92541
2.2375e-07	2.19414	1.80658	1.7604	1.86156	1.9196
2.3655e-07	2.19327	1.8022	1.75829	1.86352	1.92145
2.4935e-07	2.17992	1.7978	1.74861	1.856	1.91561
2.6855e-07	2.16577	1.77893	1.73989	1.84853	1.90466
2.9415e-07	2.14683	1.77096	1.73451	1.83705	1.89047
3.1975e-07	2.13681	1.75414	1.72436	1.83354	1.87425
3.4535e-07	2.12873	1.74388	1.71537	1.81721	1.87468
3.7095e-07	2.10991	1.7357	1.70796	1.80153	1.85975
3.9655e-07	2.10691	1.72243	1.70112	1.79526	1.84993
4.2215e-07	2.09117	1.71671	1.6945	1.78733	1.84043
4.4775e-07	2.07835	1.70467	1.69127	1.77094	1.83104
4.7335e-07	2.07338	1.69844	1.67844	1.77129	1.81642
4.9895e-07	2.05596	1.68755	1.67343	1.75104	1.8154
5.3735e-07	2.03898	1.67862	1.66348	1.75034	1.80572
5.8855e-07	2.02215	1.66505	1.65068	1.72637	1.78398
6.3975e-07	2.007	1.64787	1.63646	1.71544	1.76952
6.9095e-07	1.99375	1.63263	1.62514	1.69881	1.75756
7.4215e-07	1.96819	1.62585	1.60889	1.68843	1.74122
7.9335e-07	1.94911	1.60952	1.60753	1.67083	1.71993
8.4455e-07	1.9384	1.5932	1.59082	1.66105	1.71725
8.9575e-07	1.91925	1.58783	1.58289	1.64945	1.69355
9.4695e-07	1.90353	1.57601	1.57233	1.63546	1.69236
9.9815e-07	1.88629	1.56155	1.56854	1.62315	1.67956
1.07495e-06	1.86776	1.5508	1.55094	1.60629	1.66389
1.17735e-06	1.8455	1.5295	1.53459	1.58539	1.64413
1.27975e-06	1.81747	1.51303	1.52066	1.5678	1.62189
1.38215e-06	1.79465	1.49729	1.50626	1.54804	1.59748
1.48455e-06	1.77219	1.48279	1.491	1.5315	1.58359
1.58695e-06	1.75338	1.46764	1.47744	1.5133	1.56646
1.68935e-06	1.73406	1.45571	1.46502	1.50052	1.54948
1.79175e-06	1.71365	1.44137	1.45279	1.49018	1.5361
1.89415e-06	1.69717	1.42994	1.43815	1.47481	1.52272
1.99655e-06	1.68342	1.4171	1.43027	1.46311	1.50507
2.15015e-06	1.65512	1.40162	1.41671	1.44029	1.48859
2.35495e-06	1.62693	1.38273	1.39602	1.42241	1.46469
2.55975e-06	1.6004	1.36582	1.38059	1.40196	1.44438
2.76455e-06	1.57943	1.34973	1.36443	1.38023	1.4199
2.96935e-06	1.55564	1.33291	1.3495	1.36803	1.40538
3.17415e-06	1.53886	1.32141	1.33778	1.35167	1.39153
3.37895e-06	1.51811	1.3104	1.32378	1.33897	1.3723
3.58375e-06	1.5029	1.29605	1.31449	1.32544	1.36113
3.78855e-06	1.48596	1.28704	1.30361	1.31434	1.34952
3.99335e-06	1.47242	1.27862	1.29576	1.30346	1.33811
4.30055e-06	1.45175	1.26458	1.28306	1.29283	1.3211
4.71015e-06	1.43063	1.24866	1.267	1.27375	1.30241
5.11975e-06	1.41151	1.23761	1.25471	1.26037	1.28628
5.52935e-06	1.39379	1.22757	1.24374	1.24842	1.27509
5.93895e-06	1.37911	1.21656	1.23366	1.23878	1.26179
6.34855e-06	1.36743	1.20827	1.22321	1.22922	1.25178
6.75815e-06	1.35445	1.20197	1.21708	1.22261	1.24213
7.16775e-06	1.34359	1.19492	1.21203	1.21641	1.2348
7.57735e-06	1.33384	1.19015	1.20375	1.20927	1.22715
7.98695e-06	1.3246	1.1847	1.19885	1.20427	1.22079
8.60135e-06	1.31477	1.17802	1.1926	1.19714	1.21425
9.42055e-06	1.30228	1.16926	1.18382	1.18813	1.20348
1.02398e-05	1.29061	1.16286	1.17674	1.18195	1.19542
1.1059e-05	1.28192	1.15774	1.17129	1.17581	1.18902
1.18782e-05	1.27355	1.1524	1.16599	1.17011	1.18307
1.26974e-05	1.26517	1.14813	1.16162	1.16708	1.1768
1.35166e-05	1.25911	1.14469	1.15687	1.16134	1.17134
1.43358e-05	1.25184	1.1406	1.15252	1.15989	1.16766
1.5155e-05	1.24554	1.13704	1.15008	1.15495	1.16448
1.59742e-05	1.24136	1.13386	1.14657	1.1525	1.16096
1.7203e-05	1.23119	1.12942	1.1418	1.14692	1.15519
1.88414e-05	1.22096	1.124	1.13598	1.14064	1.14986
2.04798e-05	1.21174	1.12013	1.13146	1.13585	1.14274
2.21182e-05	1.20362	1.1144	1.12614	1.13017	1.1374
2.37566e-05	1.19507	1.1114	1.12157	1.12626	1.13246
2.5395e-05	1.18793	1.10645	1.11763	1.12167	1.12751
2.70334e-05	1.18198	1.10322	1.1128	1.11733	1.12269
2.86718e-05	1.17468	1.09947	1.10978	1.11366	1.11861
3.03102e-05	1.1684	1.0959	1.10507	1.10851	1.11427
3.19486e-05	1.16176	1.09267	1.10109	1.1044	1.10935
3.44062e-05	1.15187	1.08816	1.09643	1.09938	1.10397
3.7683e-05	1.14051	1.08198	1.09015	1.09231	1.09587
4.09598e-05	1.13105	1.07673	1.0831	1.08631	1.08914
4.42366e-05	1.12041	1.0711	1.07758	1.08024	1.08257
4.75134e-05	1.11088	1.06555	1.07176	1.07411	1.07623
5.07902e-05	1.10211	1.06098	1.06618	1.06832	1.06938
5.4067e-05	1.09368	1.05583	1.06109	1.06252	1.0647
5.73438e-05	1.08625	1.0519	1.05613	1.05764	1.05924
6.06206e-05	1.07851	1.04722	1.05141	1.05282	1.05354
6.38974e-05	1.07024	1.043	1.04661	1.04796	1.04871
6.88126e-05	1.05929	1.03649	1.0397	1.0411	1.04153
7.53662e-05	1.0464	1.02852	1.03094	1.03181	1.03208
8.19198e-05	1.03378	1.02078	1.02285	1.02297	1.02359
8.84734e-05	1.02188	1.0135	1.01547	1.01544	1.01543
9.5027e-05	1.01087	1.00732	1.00747	1.00767	1.00774
0.000101581	1	1	1	1	1
0.000108134	0.99031	0.99354	0.993367	0.9931	0.99263
0.000114688	0.98058	0.98701	0.986703	0.98589	0.98592
0.000121241	0.97111	0.981243	0.98035	0.979255	0.97901
0.000127795	0.96169	0.974813	0.973943	0.97243	0.97281
0.000137625	0.949705	0.966777	0.964607	0.963105	0.96398
0.000150733	0.93367	0.95523	0.952943	0.951425	0.95208
0.00016384	0.918845	0.94535	0.941837	0.939705	0.94075
0.000176947	0.90493	0.935187	0.9314	0.928615	0.92981
0.000190054	0.89173	0.92488	0.921473	0.918235	0.91987
0.000203161	0.8794	0.915623	0.91119	0.908115	0.90929
0.000216269	0.867195	0.906587	0.901977	0.89843	0.90012
0.000229376	0.8557	0.89776	0.89293	0.88896	0.89071
0.000242483	0.84543	0.88912	0.883853	0.8796	0.88222
0.00025559	0.834925	0.880753	0.87535	0.87059	0.87348
0.000275251	0.819815	0.868923	0.86278	0.857725	0.86097
0.000301465	0.80105	0.853487	0.846617	0.84124	0.84481
0.00032768	0.783695	0.838583	0.831473	0.82565	0.82959
0.000353894	0.767165	0.82443	0.817117	0.81054	0.81497
0.000380109	0.75164	0.810873	0.80317	0.79638	0.80106
0.000406323	0.736895	0.797623	0.78978	0.78246	0.78742
0.000432537	0.72284	0.78505	0.776913	0.76928	0.77411
0.000458752	0.70915	0.773053	0.764713	0.756465	0.76191
0.000484966	0.69664	0.76102	0.752843	0.74434	0.74983
0.000511181	0.684375	0.749777	0.741347	0.732375	0.73826
0.000550502	0.667365	0.733413	0.72473	0.71554	0.72137
0.000602931	0.646015	0.71283	0.703887	0.6942	0.70033
0.00065536	0.625745	0.693203	0.684187	0.673845	0.68073
0.000707789	0.6072	0.67486	0.665573	0.655	0.66154
0.000760217	0.58971	0.6575	0.64807	0.63734	0.64386
0.000812646	0.573055	0.64098	0.631483	0.62036	0.62731
0.000865075	0.55739	0.625367	0.615827	0.604485	0.61116
0.000917504	0.543005	0.6104	0.600687	0.589055	0.59617
0.000969933	0.529265	0.596117	0.586477	0.574575	0.58176
0.00102	0.515985	0.582477	0.572907	0.56097	0.56795
0.0011	0.497655	0.56335	0.553663	0.541345	0.54857
0.00121	0.47483	0.539417	0.52984	0.517415	0.52468
0.00131	0.45445	0.517353	0.50789	0.49554	0.50257
0.00142	0.435685	0.497123	0.487733	0.475355	0.4823
0.00152	0.41834	0.478233	0.469037	0.456755	0.46356
0.00163	0.402275	0.460877	0.451803	0.43952	0.44612
0.00173	0.38749	0.444543	0.43572	0.42332	0.42985
0.00184	0.373585	0.429373	0.42071	0.408415	0.41476
0.00194	0.360825	0.415127	0.406737	0.39447	0.40059
0.00204	0.348885	0.401717	0.39354	0.381155	0.38738
0.0022	0.33223	0.38316	0.37527	0.363265	0.36925
0.00241	0.312205	0.36079	0.353233	0.341355	0.34729
0.00262	0.29454	0.34092	0.333473	0.322015	0.32778
0.00283	0.278345	0.322927	0.31572	0.304645	0.31025
0.00304	0.263865	0.306667	0.299807	0.28898	0.29437
0.00325	0.25095	0.29197	0.28527	0.27493	0.27973
0.00346	0.239275	0.278573	0.272023	0.26192	0.26676
0.00367	0.22873	0.266137	0.259987	0.25024	0.25486
0.00388	0.218755	0.254727	0.248717	0.239495	0.24391
0.00409	0.20927	0.24424	0.23849	0.22943	0.23361
0.0044	0.19666	0.22999	0.224327	0.215815	0.21989
0.00482	0.18191	0.213313	0.207677	0.199795	0.20348
0.00524	0.16928	0.198947	0.193107	0.185775	0.18941
0.00566	0.158415	0.18587	0.18062	0.173635	0.17723
0.00608	0.148655	0.174143	0.169653	0.1629	0.16622
0.0065	0.13983	0.163973	0.159647	0.15342	0.15611
0.00692	0.132115	0.155013	0.15048	0.14455	0.14721
0.00734	0.125265	0.14685	0.142383	0.136675	0.13913
0.00776	0.118875	0.139237	0.13509	0.12958	0.1318
0.00818	0.11336	0.13222	0.128327	0.12313	0.12515
0.00881	0.10578	0.123193	0.119527	0.11422	0.1161
0.00965	0.09671	0.112833	0.109487	0.10395	0.10603
0.01049	0.08941	0.103773	0.100443	0.09541	0.09758
0.01132	0.08273	0.095963	0.092597	0.088315	0.09073
0.01216	0.076955	0.0892	0.086	0.08182	0.08419
0.013	0.07197	0.082777	0.08032	0.07621	0.07893
0.01384	0.067675	0.07725	0.07552	0.071375	0.0738
0.01468	0.063195	0.072467	0.07095	0.06693	0.06869
0.01552	0.0597	0.067723	0.066897	0.062905	0.06443
0.01636	0.05603	0.06377	0.063153	0.05922	0.06105
0.01762	0.051305	0.058723	0.058597	0.05443	0.05677
0.01929	0.04639	0.053057	0.053213	0.04926	0.05092
0.02097	0.042435	0.048443	0.048773	0.0451	0.04672
0.02265	0.038775	0.044723	0.044717	0.041385	0.04289
0.02433	0.035895	0.041503	0.04066	0.038305	0.0394
0.026	0.03361	0.038497	0.03701	0.03565	0.0368
0.02768	0.03117	0.035893	0.034453	0.033595	0.0345
0.02936	0.02865	0.033767	0.03189	0.031245	0.03153
0.03104	0.027005	0.03177	0.02991	0.029675	0.02966
0.03272	0.024875	0.030433	0.028267	0.028265	0.02777
0.03523	0.022515	0.027897	0.026003	0.025595	0.02515
0.03859	0.020435	0.024613	0.023253	0.022815	0.02209
0.04194	0.018355	0.022233	0.020943	0.020475	0.02026
0.0453	0.016385	0.020233	0.019677	0.018265	0.01903
0.04865	0.015585	0.01904	0.017443	0.0167	0.01712
0.05201	0.014255	0.017843	0.01605	0.01496	0.01605
0.05536	0.013555	0.016877	0.01549	0.013155	0.01639
0.05872	0.01284	0.01561	0.014103	0.01274	0.01518
0.06208	0.0123	0.013753	0.012997	0.01205	0.01324
0.06543	0.011555	0.012667	0.012673	0.011645	0.01203
0.07046	0.00974	0.011517	0.01203	0.01045	0.00968
0.07718	0.0084	0.009533	0.009533	0.0092	0.00845
0.08389	0.007595	0.008057	0.008597	0.00797	0.00822
0.0906	0.006055	0.007463	0.007217	0.00707	0.00774
0.09731	0.00568	0.007517	0.006877	0.007025	0.00699
0.10402	0.005025	0.0074	0.00672	0.00672	0.00706
0.11073	0.004705	0.006997	0.005607	0.005905	0.00693
0.11744	0.004475	0.005943	0.004973	0.00502	0.00608
0.12415	0.0045	0.00555	0.004877	0.00398	0.00416
0.13086	0.004445	0.005487	0.005067	0.00361	0.00473
0.14093	0.00386	0.004847	0.004653	0.00331	0.00376
0.15435	0.003825	0.004203	0.00458	0.00277	0.00332
0.16777	0.00379	0.003663	0.004143	0.00278	0.00319
0.18119	0.00379	0.002417	0.002997	0.00338	0.00274
0.19462	0.003395	0.001488	0.003303	0.002885	0.00132
0.20804	0.003325	0.001427	0.002297	0.00349	0.00174
0.22146	0.00344	0.001907	0.001763	0.00273	0.00134
0.23488	0.00252	0.001841	0.001997	0.00147	0.000487
0.2483	0.00119	0.001112	0.001566	0.001043	0.00114
0.26172	0.001543	0.000928	0.001672	0.00136	0.00151
0.28186	0.000904	0.000237	0.00165	0.000959	0.00234
0.3087	0.000714	0.00056	-7.1e-06	-0.00027	0.000941
0.33554	0.001235	0.000719	0.00041	-0.00049	0.00191
0.36239	0.000976	9.91e-05	0.000793	-0.00044	0.0018
0.38923	0.000745	0.000311	0.000406	-5.1e-05	-0.000136
0.41607	6.24e-05	0.000405	-5.2e-05	-0.00031	-0.000199
0.44292	-0.0001	0.000547	-0.00035	-0.00019	0.000299
0.46976	-0.00086	0.000763	-0.00031	0.000134	-0.00127
0.49661	4.96e-05	0.000152	0.000632	-0.0006	-0.00169
0.52345	-0.00053	0.000198	0.000717	3.95e-05	-0.000151
0.56371	-0.00017	-0.00042	0.000633	-0.00011	-0.000859
0.6174	-0.00067	-0.001	0.00066	0.000119	-0.000526
0.67109	-0.00088	-4.2e-05	-0.00084	-0.00113	-0.000746
0.72478	-0.00064	-0.0003	-0.00066	-0.00071	2.11e-05
0.77846	-0.00066	-0.00061	-0.00056	-0.00024	0.000265
0.83215	-0.00057	-0.00109	-0.0009	-0.0009	-0.000451
0.88584	-0.00116	-0.0009	-0.00147	-0.00058	-0.00107
0.93952	-0.00066	-0.0003	-0.00155	-0.0018	-0.000803
0.99321	-0.00066	-0.00138	-0.00063	-0.00102	-0.000356
