# Supplementary material for: Gradual compaction of the nascent peptide during cotranslational folding on the ribosome
Source: eLife. 2020 Oct 27;9:e60895. doi: 10.7554/eLife.60895 (PMC7593090; doi:10.7554/eLife.60895)
Supplement: Supplementary file 2. [file elife-60895-supp2.xlsx]

## Sheet: Sheet1
HemK length (aa)	Primer	Sequence 5’ to 3’
	FW	TTCAGCACGCCCGTCTGGATAAG
101 wt/4xA	RV	CTGCTCCACCAGACACTCCGTATC
99 wt/4xA	RV	CACCAGACACTCCGTATCCGGG
97 wt/4xA	RV	ACACTCCGTATCCGGGCGC
95 wt/4xA	RV	CGTATCCGGGCGCGGAATT
93 wt/4xA	RV	CGGGCGCGGAATTAAGGTC
91 wt/4xA	RV	CGGAATTAAGGTCGCTGGCGA
90 wt/4xA	RV	AATTAAGGTCGCTGGCGAAACAA
89 wt/4xA	RV	TAAGGTCGCTGGCGAAACAAATA
88 wt/4xA	RV	GGTCGCTGGCGAAACAAATAACG
87 wt/4xA	RV	CGCTGGCGAAACAAATAACGG
86 wt/4xA	RV	TGGCGAAACAAATAACGGCAAC
85 wt/4xA	RV	CGAAACAAATAACGGCAACGACC
84 wt/4xA	RV	AACAAATAACGGCAACGACCAGAA
83 wt/4xA	RV	AAATAACGGCAACGACCAGAATTCT
82 wt/4xA	RV	TAACGGCAACGACCAGAATTCTCG
81 wt/4xA	RV	CGGCAACGACCAGAATTCTCG
80 wt/4xA	RV	CAACGACCAGAATTCTCGCACCC
79 wt/4xA	RV	CGACCAGAATTCTCGCACCCC
78 wt/4xA	RV	CCAGAATTCTCGCACCCCGG
77 wt/4xA	RV	GAATTCTCGCACCCCGGTTAAAT
76 wt/4xA	RV	TTCTCGCACCCCGGTTAAATGA
75 wt/4xA	RV	TCGCACCCCGGTTAAATGAGC
73 wt/4xA	RV	CCCGGTTAAATGAGCAATGGGTT
71 wt/4xA	RV	TAAATGAGCAATGGGTTCACCATC
68 wt/4xA	RV	AATGGGTTCACCATCGCGACGAC
66 wt/4xA	RV	TTCACCATCGCGACGACGTGTC
64 wt	RV	ATCGCGACGACGTGTCAGTAGCG
62 wt	RV	ACGACGTGTCAGTAGCGCATCAAG
60 wt	RV	TGTCAGTAGCGCATCAAGTTGCTGA
58 wt	RV	TAGCGCATCAAGTTGCTGACATTGTTC
56 wt	RV	ATCAAGTTGCTGACATTGTTCGTCAGTC
54 wt/4xA	RV	TTGCTGACATTGTTCGTCAGTCAGCT
52 wt/4xA	RV	ACATTGTTCGTCAGTCAGCTGCGTTT
50 wt/4xA	RV	TTCGTCAGTCAGCTGCGTTTCACC
48 wt/4xA	RV	AGTCAGCTGCGTTTCACCAAAGGC
46 wt/4xA	RV	CTGCGTTTCACCAAAGGCGAGG
44 wt/4xA	RV	TTCACCAAAGGCGAGGATAAAAGTACG
42 wt/4xA	RV	AAAGGCGAGGATAAAAGTACGCCCTT
40 wt/4xA	RV	GAGGATAAAAGTACGCCCTTTGCCG
38 wt/4xA	RV	AAAAGTACGCCCTTTGCCGGTAAC
36 wt/4xA	RV	ACGCCCTTTGCCGGTAACATGT
34 wt	RV	TTTGCCGGTAACATGTTCCAGCAG
32 wt	RV	GGTAACATGTTCCAGCAGGATTTCAGC
30 wt	RV	ATGTTCCAGCAGGATTTCAGCATCAC
28 wt	RV	CAGCAGGATTTCAGCATCACGCC
26 wt/4xA	RV	GATTTCAGCATCACGCCGCGG
24 wt/4xA	RV	AGCATCACGCCGCGGGCT
22 wt/4xA	RV	ACGCCGCGGGCTTTCGCT
15 wt/4xA	RV	CTGAAGTTGGCTTATTGCTTCACGTAAC
64 4xA	RV	ATCGCGACGACGTGTCAGTGC
62 4xA	RV	ACGACGTGTCAGTGCCGCATC
58 4xA	RV	TGCCGCATCAGCTTGCTGAC
56 4xA	RV	ATCAGCTTGCTGACATTGTTCGTCAG
34 4xA	RV	TTTGCCGGTAACATGTTCCGC
32 4xA	RV	GGTAACATGTTCCGCCGCGATT
30 4xA	RV	ATGTTCCGCCGCGATTTCAGC
28 4xA	RV	CGCCGCGATTTCAGCATCA
